# Supplementary material for: Genome-wide identification of MAXs genes for strigolactones synthesis/signaling in solanaceous plants and analysis of their potential functions in tobacco
Source: PeerJ. 2023 Jan 12;11:e14669. doi: 10.7717/peerj.14669 (PMC9840856; doi:10.7717/peerj.14669)
Supplement: Supplemental Information 2 [file peerj-11-14669-s002.xlsx]

## Sheet: Sheet1
		MAX1					MAX2																MAX3								MAX4
		mRNA_49921	mRNA_42371	mRNA_49611	mRNA_44016	Niben101Scf01777g03001.1	mRNA_29422	mRNA_29423	mRNA_29424	mRNA_20815	mRNA_20816	mRNA_20817	mRNA_20818	mRNA_48826	mRNA_67458_cds	mRNA_67459_cds	mRNA_67460_cds	Niben101Scf00536g02005.1	Niben101Scf01068g01004.1	Niben101Scf04933g00008.1	Niben101Scf09559g00005.1	Niben101Scf10248g01017.1	mRNA_108065	mRNA_108066	mRNA_108067	mRNA_34367	mRNA_51017	mRNA_51018	mRNA_110488	mRNA_68553	mRNA_112609	mRNA_141629	mRNA_89885	mRNA_98197	mRNA_104099	mRNA_112966	mRNA_52451	mRNA_11465_cds	mRNA_11466_cds	mRNA_11467_cds	mRNA_11468_cds	mRNA_11469_cds	mRNA_11470_cds	mRNA_51723_cds	mRNA_51724_cds	mRNA_8034_cds	mRNA_8035_cds	mRNA_8036_cds	mRNA_8037_cds
ABA	ABREOSRAB21	0	0	0	0	0	0	0	0	0	0	0	0	1	0	0	0	0	1	0	0	1	0	0	0	0	0	0	0	0	2	0	0	2	0	2	2	0	0	0	1	0	0	0	0	0	0	0	0
ABA	ACGTABREMOTIFA2OSEM	0	0	0	0	0	0	0	0	0	0	0	0	0	0	0	0	0	0	0	0	0	0	1	0	0	0	1	0	0	1	0	0	1	0	1	1	0	0	0	1	2	2	3	3	0	0	0	0
ABA	ABREATCONSENSUS	0	0	0	0	0	0	0	0	0	0	0	0	0	0	0	0	0	0	0	0	0	0	1	0	0	0	1	0	0	0	0	0	0	0	0	0	0	0	0	0	1	1	1	1	0	0	0	0
ABA	ABREATRD22	0	0	0	0	0	0	0	0	0	0	0	0	0	0	0	0	0	0	0	0	0	0	0	0	0	0	0	0	0	0	0	0	0	0	0	0	0	0	0	0	1	1	1	1	0	0	0	0
Auxin	D4GMAUX28	0	0	0	0	0	0	0	0	0	0	0	0	0	0	0	0	0	0	0	0	0	0	0	0	0	0	0	0	0	0	0	0	0	0	0	0	0	0	0	0	0	0	0	0	1	0	1	0
Auxin	ARFAT	1	1	2	2	1	0	0	0	1	1	1	1	1	1	1	1	1	0	0	2	1	1	0	0	0	0	0	0	0	0	1	1	0	1	0	0	2	2	2	3	0	1	1	1	4	0	4	0
Auxin	CATATGGMSAUR	0	0	0	0	0	0	0	0	0	0	0	0	0	0	0	0	0	2	0	4	2	2	2	2	4	2	2	2	6	0	2	2	0	2	0	0	2	2	2	2	0	0	0	0	6	0	6	0
Auxin	C2GMAUX28	0	0	0	0	0	0	0	0	0	0	0	0	0	0	0	0	0	0	1	0	0	0	0	0	0	0	0	0	0	0	0	0	0	0	0	0	2	0	0	0	0	0	0	0	0	0	0	0
Auxin	ASF1MOTIFCAMV	1	2	2	2	0	2	2	2	3	3	3	3	1	3	3	3	3	0	0	1	5	0	1	1	1	1	1	1	1	1	1	1	1	1	1	1	0	1	0	0	1	1	5	5	0	3	0	3
Auxin	AUXREPSIAA4	0	0	0	0	0	0	0	0	0	0	0	0	0	0	0	0	0	0	0	0	0	0	1	0	0	0	1	0	0	0	1	1	0	1	0	0	0	0	0	0	0	0	0	0	0	0	0	0
Cytokinin	CPBCSPOR	4	0	2	2	1	2	2	2	2	2	2	2	5	2	2	2	2	4	6	2	0	2	4	1	8	3	5	3	1	3	3	3	3	3	3	3	3	3	3	1	1	1	1	1	2	3	2	3
Ethylene	ERELEE4	0	0	1	1	3	1	1	1	0	0	0	0	0	2	2	2	2	0	1	2	2	0	1	2	1	2	1	1	0	1	2	2	1	2	1	1	0	0	0	4	1	0	0	0	2	1	2	1
Gibberellin	GAREAT	1	4	3	3	2	3	3	3	3	3	3	3	1	3	3	3	3	3	2	1	1	0	1	5	2	5	2	5	6	1	1	1	1	1	1	1	3	3	3	1	4	4	1	1	4	0	4	0
Gibberellin	MYBGAHV	1	4	1	0	1	2	2	2	2	2	2	2	1	2	2	2	2	2	2	1	0	0	0	4	1	4	1	4	5	0	0	0	0	0	0	0	2	2	2	1	3	3	0	0	3	0	3	0
Gibberellin	TATCCACHVAL21	0	0	1	0	0	1	1	1	1	1	1	1	0	1	1	1	1	0	0	0	0	0	0	0	1	0	0	0	0	1	0	0	1	0	1	1	0	0	0	2	1	1	0	0	0	1	0	1
Gibberellin	GARE2OSREP1	1	0	0	0	0	0	0	0	0	0	0	0	0	0	0	0	0	1	0	0	0	0	0	0	1	0	0	0	0	1	1	1	1	1	1	1	0	0	0	0	0	0	0	0	0	0	0	0
Gibberellin	GARE1OSREP1	0	0	0	0	0	0	0	0	0	0	0	0	0	0	0	0	0	2	1	0	1	0	0	0	0	0	0	0	0	0	0	0	0	0	0	0	0	0	0	0	1	0	1	1	0	0	0	0
Sucrose	CMSRE1IBSPOA	0	0	2	2	0	0	0	0	0	0	0	0	1	0	0	0	0	0	0	0	0	0	1	0	0	0	1	0	0	0	0	0	0	0	0	0	0	0	0	0	0	0	0	0	0	0	0	0
Sucrose	SURE1STPAT21	0	0	0	0	0	1	1	1	1	1	1	1	1	1	1	1	1	0	0	0	1	0	0	0	0	0	0	0	0	1	1	1	1	1	1	1	0	0	0	0	0	0	1	1	0	0	0	0
Sucrose	SURE2STPAT21	0	0	0	0	0	0	0	0	0	0	0	0	0	0	0	0	0	0	0	0	0	0	0	0	0	1	0	1	0	0	0	0	0	0	0	0	1	1	1	1	1	1	0	0	0	0	0	0
Sucrose	TATCCAOSAMY	2	1	3	1	0	4	4	4	3	3	3	3	2	3	3	3	3	4	2	0	1	4	3	1	3	2	3	2	0	3	2	2	3	2	3	3	1	2	1	4	5	5	0	0	2	1	2	1
Sucrose	TATCCAYMOTIFOSRAMY3D	1	1	1	0	0	3	3	3	2	2	2	2	1	2	2	2	2	2	0	0	0	2	2	1	3	1	2	1	0	3	1	1	2	1	2	2	0	0	0	2	1	1	0	0	0	1	0	1
Cold	CRTDREHVCBF2	2	0	0	0	0	0	0	0	0	0	0	0	4	0	0	0	0	2	0	0	10	0	0	0	0	0	0	0	0	0	0	0	0	0	0	0	2	2	2	0	0	2	0	0	0	0	0	0
Cold	LTRECOREATCOR15	2	1	1	1	0	1	1	1	1	1	1	1	2	2	2	2	2	3	2	1	3	1	2	3	0	3	2	3	1	6	0	0	1	0	1	1	0	0	0	0	0	0	3	3	0	0	0	0
Cold	CBFHV	4	2	0	0	1	1	1	1	1	1	1	1	6	1	1	1	1	4	1	0	12	1	1	1	0	1	1	1	0	3	1	1	3	1	3	3	2	2	2	1	0	2	1	1	0	0	0	0
Cold	LTRE1HVBLT49	0	0	1	1	1	1	1	1	1	1	1	1	1	1	1	1	1	2	1	0	1	1	2	2	0	2	2	2	1	2	1	1	2	1	2	2	0	1	0	0	2	1	1	1	0	0	0	0
Cold	LTREATLTI78	0	0	0	0	0	0	0	0	0	0	0	0	0	0	0	0	0	0	0	0	0	0	0	1	0	1	0	1	0	0	0	0	0	1	0	0	0	0	0	0	0	0	1	1	0	0	0	0
Pathogenesis	WBOXATNPR1	10	6	5	5	5	3	3	3	2	2	2	2	6	2	2	2	2	7	2	3	8	4	5	9	5	10	6	10	11	11	2	2	11	2	11	9	8	7	6	2	6	5	9	9	4	2	4	2
Pathogenesis	SEBFCONSSTPR10A	1	3	2	2	1	2	2	2	2	2	2	2	0	2	2	2	2	0	1	2	2	1	0	0	0	0	0	0	0	0	2	2	0	2	0	0	3	3	3	3	1	3	0	0	3	0	3	0
Pathogenesis	DRE2COREZMRAB17	1	1	0	0	0	0	0	0	0	0	0	0	0	0	0	0	0	1	0	0	0	0	1	1	0	1	1	1	0	0	0	0	0	0	0	0	0	0	0	0	0	0	1	1	0	0	0	0
Stress	MYCATRD22	1	3	0	1	0	1	1	1	1	1	1	1	0	2	2	2	2	1	1	1	0	2	0	2	1	1	0	1	1	3	2	2	3	2	3	3	3	3	3	3	3	3	0	0	2	2	2	2
Stress	MYBCORE	4	10	6	7	7	8	8	8	9	9	9	9	7	10	10	10	10	10	3	9	5	7	7	1	4	3	9	3	8	6	9	9	6	9	6	6	8	7	7	6	11	8	8	8	12	9	12	9
Stress	MYB2CONSENSUSAT	1	9	2	3	5	4	4	4	5	5	5	5	4	6	6	6	6	5	1	7	3	4	3	1	1	3	5	3	5	3	4	4	3	4	3	3	2	2	2	4	9	8	3	3	5	4	5	4
Stress	MYCATERD1	1	3	0	1	0	1	1	1	1	1	1	1	0	2	2	2	2	1	1	1	0	2	0	2	1	1	0	1	1	3	2	2	3	2	3	3	3	3	3	3	3	3	0	0	2	2	2	2
Wounding	WBOXNTERF3	13	7	6	6	6	6	6	6	3	3	3	3	9	4	4	4	4	10	8	8	14	5	6	10	5	11	8	11	13	13	2	2	13	2	13	11	4	3	3	5	7	7	11	11	5	4	5	4
Light	IBOXCORENT	1	2	0	0	0	1	1	1	1	1	1	1	3	1	1	1	1	1	3	0	0	2	1	1	0	1	1	1	0	4	1	1	4	1	4	4	1	1	1	0	0	0	2	2	1	0	1	0
Light	SORLIP2AT	2	5	1	1	0	4	4	4	4	4	4	4	2	2	2	2	2	4	2	1	10	1	4	1	0	1	4	1	1	5	1	1	5	1	5	5	1	1	1	0	0	0	1	1	1	2	1	2
Light	SORLIP5AT	0	1	0	0	1	0	0	0	0	0	0	0	0	0	0	0	0	0	0	0	0	0	0	0	0	0	0	0	0	0	0	0	0	0	0	0	1	1	1	0	0	0	0	0	1	0	1	0
Light	SORLIP3AT	0	0	1	1	1	0	0	0	0	0	0	0	0	0	0	0	0	0	0	0	0	0	0	0	0	0	0	0	0	0	0	0	0	0	0	0	0	0	0	0	0	0	0	0	0	0	0	0
Light	SORLREP3AT	0	0	1	1	0	0	0	0	0	0	0	0	0	0	0	0	0	1	1	0	0	0	0	0	0	0	0	0	0	0	1	1	0	1	0	0	0	0	0	0	0	0	0	0	0	0	0	0
Light	IBOX	2	2	1	1	0	1	1	1	1	1	1	1	4	1	1	1	1	3	3	0	7	2	2	3	0	3	2	3	1	2	2	2	6	2	6	6	1	1	1	0	0	0	2	2	1	0	1	0
Light	IBOXCORE	5	10	11	9	11	9	9	9	9	9	9	9	16	9	9	9	9	18	21	8	19	14	8	11	12	11	11	12	7	10	9	9	10	9	10	12	7	6	7	8	7	8	10	10	13	3	13	3
Light	INRNTPSADB	4	5	8	11	8	7	7	7	6	6	6	6	7	7	7	7	7	7	6	1	6	4	4	7	3	7	4	6	8	7	8	8	7	8	7	6	4	3	5	1	5	5	7	7	8	3	8	3
Light	SORLIP1AT	2	2	1	2	0	1	1	1	1	1	1	1	5	2	2	2	2	1	3	0	2	4	5	0	2	0	5	0	1	2	1	1	2	1	2	2	2	2	2	2	4	5	2	2	2	4	2	4
Axillary bud outgrowth	UP2ATMSD	1	1	1	1	1	0	0	0	0	0	0	0	0	0	0	0	0	0	0	0	0	0	0	0	0	0	0	0	0	0	0	0	0	0	0	0	0	0	0	0	0	0	0	0	0	0	0	0
Axillary bud outgrowth	SREATMSD	0	4	1	1	1	1	1	1	1	1	1	1	5	1	1	1	1	1	1	2	2	3	3	2	3	2	3	2	2	2	0	0	2	0	2	2	0	0	0	2	2	3	1	1	3	0	3	0
Axillary bud outgrowth	UP1ATMSD	0	0	0	0	0	0	0	0	0	0	0	0	0	0	0	0	0	0	0	0	0	0	0	0	0	0	0	0	0	0	1	1	0	1	0	0	0	0	0	0	0	0	0	0	0	0	0	0
L1 layer-specific expression	L1BOXATPDF1	1	0	0	0	2	0	0	0	1	1	1	1	1	2	2	2	2	1	2	0	0	0	0	0	1	0	0	0	0	0	0	0	0	0	0	0	1	1	1	0	0	0	1	1	1	0	1	0
shoot	NTBBF1ARROLB	2	1	4	5	2	4	4	4	2	2	2	2	2	3	3	3	3	3	4	3	2	3	2	6	5	6	3	6	7	4	1	1	4	1	4	4	1	2	1	5	5	5	2	2	5	0	5	0
shoot	RAV1AAT	6	4	8	8	11	6	6	6	7	7	7	7	5	8	8	8	8	5	6	8	3	6	14	7	11	9	13	9	7	6	7	7	6	7	6	6	20	15	16	3	6	10	6	6	8	7	8	7
shoot	RAV1BAT	0	0	2	1	1	1	1	1	1	1	1	1	0	1	1	1	1	2	0	0	0	0	0	0	0	0	0	0	1	7	2	2	7	2	7	7	0	0	0	0	0	0	0	0	0	0	0	0
TCP-domain; meristem	SITEIIATCYTC	2	3	1	1	0	3	3	3	1	1	1	1	0	1	1	1	1	4	0	4	2	1	0	1	1	1	0	1	0	3	2	2	3	2	3	2	0	0	0	0	0	0	1	1	2	1	2	1
[truncated: 5 more columns]
