# Supplementary material for: Genome-wide identification of MAXs genes for strigolactones synthesis/signaling in solanaceous plants and analysis of their potential functions in tobacco
Source: PeerJ. 2023 Jan 12;11:e14669. doi: 10.7717/peerj.14669 (PMC9840856; doi:10.7717/peerj.14669)
Supplement: Supplemental Information 3 [file peerj-11-14669-s003.xls]

## Sheet: Tissue-MAX1-Max2
Block Type	96alum
Chemistry	SYBR_GREEN
Experiment File Name	D:20220402-1.eds
Experiment Run End Time	2022-04-02 12:03:39
Instrument Type	sds7500
Passive Reference	ROX
Well	Sample Name	Target Name	Task	Reporter	Quencher	RQ	RQ Min	RQ Max	Cт	Cт Mean	Cт SD	ΔCт	ΔCт Mean	ΔCт SE	HK Control ΔCт Mean	HK Control ΔCт SE	ΔΔCт	Automatic Ct Threshold	Ct Threshold	Automatic Baseline	Baseline Start	Baseline End	Efficiency	Tm1	Tm2	Tm3	Comments	HIGHSD	NOAMP	EXPFAIL	MTP
A1	Sample 1	tubclin	UNKNOWN	SYBR	None				31.7421	30.1493	0.900652							TRUE	0.292001	TRUE	3	30	1	77.7068				Y	N	N	N
A2	Sample 1	tubclin	UNKNOWN	SYBR	None				30.5583	30.1493	0.900652							TRUE	0.292001	TRUE	3	28	1	77.8972				Y	N	N	N
A3	Sample 1	tubclin	UNKNOWN	SYBR	None				30.0072	30.1493	0.900652							TRUE	0.292001	TRUE	3	27	1	78.0876				Y	N	N	N
A4	Sample 1	Max1	UNKNOWN	SYBR	None				36.4741	36.2578	1.12764							TRUE	0.0375641	TRUE	3	35	1	73.5181				Y	N	N	N
A5	Sample 1	Max1	UNKNOWN	SYBR	None				36.0521	36.2578	1.12764							TRUE	0.0375641	TRUE	3	34	1	81.3243				Y	N	N	N
A6	Sample 1	Max1	UNKNOWN	SYBR	None				36.2471	36.2578	1.12764							TRUE	0.0375641	TRUE	3	33	1	81.3243				Y	N	N	N
A7	Sample 1	Max2	UNKNOWN	SYBR	None				34.1715	34.2236	0.0809142							TRUE	0.400739	TRUE	3	28	1	81.8955	76.374			N	N	N	Y
A8	Sample 1	Max2	UNKNOWN	SYBR	None				34.2913	34.2236	0.0809142							TRUE	0.400739	TRUE	3	28	1	82.0859	75.9932			N	N	N	Y
A9	Sample 1	Max2	UNKNOWN	SYBR	None				34.1372	34.2236	0.0809142							TRUE	0.400739	TRUE	3	28	1	82.0859				N	N	N	N
A10	Sample 1	tubclin	UNKNOWN	SYBR	None				29.185	30.1493	0.900652							TRUE	0.292001	TRUE	3	25	1	77.8972				Y	N	N	N
A11	Sample 1	tubclin	UNKNOWN	SYBR	None				29.719	30.1493	0.900652							TRUE	0.292001	TRUE	3	26	1	77.7068				Y	N	N	N
A12	Sample 1	tubclin	UNKNOWN	SYBR	None				29.6842	30.1493	0.900652							TRUE	0.292001	TRUE	3	25	1	77.5164				Y	N	N	N
B1	Sample 2	tubclin	UNKNOWN	SYBR	None				28.8896	28.9237	0.710667							TRUE	0.292001	TRUE	3	27	1	77.8972				Y	N	N	N
B2	Sample 2	tubclin	UNKNOWN	SYBR	None				28.2308	28.9237	0.710667							TRUE	0.292001	TRUE	3	25	1	78.0876				Y	N	N	N
B3	Sample 2	tubclin	UNKNOWN	SYBR	None				29.6509	28.9237	0.710667							TRUE	0.292001	TRUE	3	25	1	78.278				Y	N	N	N
B4	Sample 2	Max1	UNKNOWN	SYBR	None				38.4952	38.4952	2.00321							TRUE	0.0375641	TRUE	3	39	1	62.6655				N	Y	Y	N
B5	Sample 2	Max1	UNKNOWN	SYBR	None				38.0787	38.4952	2.00321							TRUE	0.0375641	TRUE	3	34	1	74.2797				Y	N	N	N
B6	Sample 2	Max1	UNKNOWN	SYBR	None				38.9116	38.4952	2.00321							TRUE	0.0375641	TRUE	3	35	1	61.5232				Y	N	N	N
B7	Sample 2	Max2	UNKNOWN	SYBR	None	0.652658	0.394217	1.08053	32.7241	32.3598	0.335333		4.43605	0.307591			0.615601	TRUE	0.400739	TRUE	3	27	1	82.2763				N	N	N	N
B8	Sample 2	Max2	UNKNOWN	SYBR	None	0.652658	0.394217	1.08053	32.2914	32.3598	0.335333		4.43605	0.307591			0.615601	TRUE	0.400739	TRUE	3	26	1	82.6571				N	N	N	N
B9	Sample 2	Max2	UNKNOWN	SYBR	None	0.652658	0.394217	1.08053	32.064	32.3598	0.335333		4.43605	0.307591			0.615601	TRUE	0.400739	TRUE	3	26	1	82.2763				N	N	N	N
B10	Sample 2	tubclin	UNKNOWN	SYBR	None				27.2478	27.9237	0.58547							TRUE	0.292001	TRUE	3	22	1	78.0876				Y	N	N	N
B11	Sample 2	tubclin	UNKNOWN	SYBR	None				27.6751	27.9237	0.58547							TRUE	0.292001	TRUE	3	22	1	77.8972				Y	N	N	N
B12	Sample 2	tubclin	UNKNOWN	SYBR	None				27.5179	27.9237	0.58547							TRUE	0.292001	TRUE	3	21	1	77.7068				Y	N	N	N
C1	Sample 3	tubclin	UNKNOWN	SYBR	None				28.306	27.9118	0.225429							TRUE	0.292001	TRUE	3	26	1	78.0876				N	N	N	N
C2	Sample 3	tubclin	UNKNOWN	SYBR	None				27.9115	27.9118	0.225429							TRUE	0.292001	TRUE	3	25	1	78.278				N	N	N	N
C3	Sample 3	tubclin	UNKNOWN	SYBR	None				27.9196	27.9118	0.225429							TRUE	0.292001	TRUE	3	24	1	78.4684				N	N	N	N
C4	Sample 3	Max1	UNKNOWN	SYBR	None				34.9586	34.9586	2.19026							TRUE	0.0375641	TRUE	3	39	1	62.2847				N	Y	Y	N
C5	Sample 3	Max1	UNKNOWN	SYBR	None				35.5074	34.9586	2.19026							TRUE	0.0375641	TRUE	3	34	1	76.1836				Y	N	N	N
C6	Sample 3	Max1	UNKNOWN	SYBR	None				34.4099	34.9586	2.19026							TRUE	0.0375641	TRUE	3	31	1	81.8955				Y	N	N	N
C7	Sample 3	Max2	UNKNOWN	SYBR	None	0.502478	0.331424	0.761815	32.993	32.8341	0.293385		4.81332	0.253901			0.992869	TRUE	0.400739	TRUE	3	27	1	81.8955				N	N	N	N
C8	Sample 3	Max2	UNKNOWN	SYBR	None	0.502478	0.331424	0.761815	32.4955	32.8341	0.293385		4.81332	0.253901			0.992869	TRUE	0.400739	TRUE	3	26	1	82.4667				N	N	N	N
C9	Sample 3	Max2	UNKNOWN	SYBR	None	0.502478	0.331424	0.761815	33.0138	32.8341	0.293385		4.81332	0.253901			0.992869	TRUE	0.400739	TRUE	3	26	1	82.8475				N	N	N	N
C10	Sample 3	tubclin	UNKNOWN	SYBR	None				27.5067	28.0208	0.463299							TRUE	0.292001	TRUE	3	22	1	78.278				N	N	N	N
C11	Sample 3	tubclin	UNKNOWN	SYBR	None				27.6664	28.0208	0.463299							TRUE	0.292001	TRUE	3	22	1	77.8972				N	N	N	N
C12	Sample 3	tubclin	UNKNOWN	SYBR	None				28.3612	28.0208	0.463299							TRUE	0.292001	TRUE	3	22	1	77.5164				N	N	N	N
D1	Sample 4	tubclin	UNKNOWN	SYBR	None				26.8702	26.5878	0.342126							TRUE	0.292001	TRUE	3	24	1	78.278				N	N	N	N
D2	Sample 4	tubclin	UNKNOWN	SYBR	None				27.0991	26.5878	0.342126							TRUE	0.292001	TRUE	3	24	1	78.4684				N	N	N	N
D3	Sample 4	tubclin	UNKNOWN	SYBR	None				26.1417	26.5878	0.342126							TRUE	0.292001	TRUE	3	21	1	78.4684				N	N	N	N
D4	Sample 4	Max1	UNKNOWN	SYBR	None	1.09848	0.832738	1.44901	32.5502	32.5608	0.164728		5.97293	0.168978			-0.135503	TRUE	0.0375641	TRUE	3	30	1	81.8955				N	N	N	N
D5	Sample 4	Max1	UNKNOWN	SYBR	None	1.09848	0.832738	1.44901	32.7305	32.5608	0.164728		5.97293	0.168978			-0.135503	TRUE	0.0375641	TRUE	3	30	1	81.8955				N	N	N	N
D6	Sample 4	Max1	UNKNOWN	SYBR	None	1.09848	0.832738	1.44901	32.4016	32.5608	0.164728		5.97293	0.168978			-0.135503	TRUE	0.0375641	TRUE	3	30	1	81.8955				N	N	N	N
D7	Sample 4	Max2	UNKNOWN	SYBR	None	0.411546	0.323911	0.522892	31.6547	31.6892	0.0742005		5.10132	0.146094			1.28087	TRUE	0.400739	TRUE	3	26	1	82.4667				N	N	N	N
D8	Sample 4	Max2	UNKNOWN	SYBR	None	0.411546	0.323911	0.522892	31.7743	31.6892	0.0742005		5.10132	0.146094			1.28087	TRUE	0.400739	TRUE	3	26	1	82.8475				N	N	N	N
D9	Sample 4	Max2	UNKNOWN	SYBR	None	0.411546	0.323911	0.522892	31.6384	31.6892	0.0742005		5.10132	0.146094			1.28087	TRUE	0.400739	TRUE	3	25	1	82.8475				N	N	N	N
D10	Sample 4	tubclin	UNKNOWN	SYBR	None				26.4153	26.5878	0.342126							TRUE	0.292001	TRUE	3	21	1	78.278				N	N	N	N
D11	Sample 4	tubclin	UNKNOWN	SYBR	None				26.5037	26.5878	0.342126							TRUE	0.292001	TRUE	3	20	1	78.0876				N	N	N	N
D12	Sample 4	tubclin	UNKNOWN	SYBR	None				26.4969	26.5878	0.342126							TRUE	0.292001	TRUE	3	21	1	77.8972				N	N	N	N
E1	Sample 5	tubclin	UNKNOWN	SYBR	None				32.9518	32.5102	0.321535							TRUE	0.292001	TRUE	3	30	1	78.0876				N	N	N	N
E2	Sample 5	tubclin	UNKNOWN	SYBR	None				32.7073	32.5102	0.321535							TRUE	0.292001	TRUE	3	29	1	78.278				N	N	N	N
E3	Sample 5	tubclin	UNKNOWN	SYBR	None				32.7103	32.5102	0.321535							TRUE	0.292001	TRUE	3	29	1	78.4684				N	N	N	N
E4	Sample 5	Max1	UNKNOWN	SYBR	None				33.3575	33.9145	0.787781							TRUE	0.0375641	TRUE	3	31	1	81.8955				Y	N	N	N
E5	Sample 5	Max1	UNKNOWN	SYBR	None				34.4715	33.9145	0.787781							TRUE	0.0375641	TRUE	3	31	1	75.9932				Y	N	N	N
E6	Sample 5	Max1	UNKNOWN	SYBR	None				33.9145	33.9145	0.787781							TRUE	0.0375641	TRUE	3	39	1	61.904	75.422	83.9898		N	Y	Y	Y
E7	Sample 5	Max2	UNKNOWN	SYBR	None	1.65696	1.28597	2.13498	35.6997	35.6021	0.141618		3.09191	0.154648			-0.72854	TRUE	0.400739	TRUE	3	30	1	76.374				N	N	N	N
E8	Sample 5	Max2	UNKNOWN	SYBR	None	1.65696	1.28597	2.13498	35.4397	35.6021	0.141618		3.09191	0.154648			-0.72854	TRUE	0.400739	TRUE	3	29	1	76.374				N	N	N	N
E9	Sample 5	Max2	UNKNOWN	SYBR	None	1.65696	1.28597	2.13498	35.6669	35.6021	0.141618		3.09191	0.154648			-0.72854	TRUE	0.400739	TRUE	3	30	1	81.8955	75.9932			N	N	N	Y
E10	Sample 5	tubclin	UNKNOWN	SYBR	None				32.1558	32.5102	0.321535							TRUE	0.292001	TRUE	3	26	1	78.278				N	N	N	N
E11	Sample 5	tubclin	UNKNOWN	SYBR	None				32.277	32.5102	0.321535							TRUE	0.292001	TRUE	3	26	1	78.0876				N	N	N	N
E12	Sample 5	tubclin	UNKNOWN	SYBR	None				32.2591	32.5102	0.321535							TRUE	0.292001	TRUE	3	27	1	77.8972				N	N	N	N
F1	Sample 6	tubclin	UNKNOWN	SYBR	None				27.6825	27.4393	0.271732							TRUE	0.292001	TRUE	3	25	1	78.0876				N	N	N	N
F2	Sample 6	tubclin	UNKNOWN	SYBR	None				27.4758	27.4393	0.271732							TRUE	0.292001	TRUE	3	24	1	78.278				N	N	N	N
F3	Sample 6	tubclin	UNKNOWN	SYBR	None				27.1831	27.4393	0.271732							TRUE	0.292001	TRUE	3	23	1	78.278				N	N	N	N
F4	Sample 6	Max1	UNKNOWN	SYBR	None	2.46963	1.58201	3.85527	32.3045	32.5434	0.208199		4.80414	0.27173			-1.30429	TRUE	0.0375641	TRUE	3	30	1	81.7051				N	N	N	N
F5	Sample 6	Max1	UNKNOWN	SYBR	None	2.46963	1.58201	3.85527	32.6392	32.5434	0.208199		4.80414	0.27173			-1.30429	TRUE	0.0375641	TRUE	3	30	1	81.8955				N	N	N	N
F6	Sample 6	Max1	UNKNOWN	SYBR	None	2.46963	1.58201	3.85527	32.6864	32.5434	0.208199		4.80414	0.27173			-1.30429	TRUE	0.0375641	TRUE	3	29	1	81.5147				N	N	N	N
F7	Sample 6	Max2	UNKNOWN	SYBR	None	0.0914559	0.0283838	0.294682	35.9443	34.7105	1.22142		7.27123	0.71386			3.45078	TRUE	0.400739	TRUE	3	30	1	83.0378	76.7548			Y	N	N	Y
F8	Sample 6	Max2	UNKNOWN	SYBR	None	0.0914559	0.0283838	0.294682	33.5019	34.7105	1.22142		7.27123	0.71386			3.45078	TRUE	0.400739	TRUE	3	27	1	82.8475				Y	N	N	N
F9	Sample 6	Max2	UNKNOWN	SYBR	None	0.0914559	0.0283838	0.294682	34.6853	34.7105	1.22142		7.27123	0.71386			3.45078	TRUE	0.400739	TRUE	3	29	1	83.0378	76.1836			Y	N	N	Y
F10	Sample 6	tubclin	UNKNOWN	SYBR	None				27.1147	27.4393	0.271732							TRUE	0.292001	TRUE	3	21	1	78.278				N	N	N	N
F11	Sample 6	tubclin	UNKNOWN	SYBR	None				27.8047	27.4393	0.271732							TRUE	0.292001	TRUE	3	25	1	77.8972				N	N	N	N
F12	Sample 6	tubclin	UNKNOWN	SYBR	None				27.3748	27.4393	0.271732							TRUE	0.292001	TRUE	3	22	1	77.7068				N	N	N	N
Analysis Type	Singleplex
Endogenous Control	tubclin
RQ Min/Max Confidence Level	95.0
Reference Sample	Sample 1

## Sheet: Tissue-Max3-Max4
Block Type	96alum
Chemistry	SYBR_GREEN
Experiment File Name	D:\20220412-1.eds
Experiment Run End Time	2022-04-12 12:43:15
Instrument Type	sds7500
Passive Reference	ROX
Well	Sample Name	Target Name	Task	Reporter	Quencher	RQ	RQ Min	RQ Max	Cт	Cт Mean	Cт SD	ΔCт	ΔCт Mean	ΔCт SE	HK Control ΔCт Mean	HK Control ΔCт SE	ΔΔCт	Automatic Ct Threshold	Ct Threshold	Automatic Baseline	Baseline Start	Baseline End	Efficiency	Tm1	Tm2	Tm3	Comments	HIGHSD	NOAMP	EXPFAIL	MTP
A1	terminal	tubclin	UNKNOWN	SYBR	None				30.2593	30.0843	3.30801							TRUE	0.0225	TRUE	3	30	1	77.5684				Y	N	N	N
A2	terminal	tubclin	UNKNOWN	SYBR	None				30.0866	30.0843	3.30801							TRUE	0.0225	TRUE	3	29	1	77.7593				Y	N	N	N
A3	terminal	tubclin	UNKNOWN	SYBR	None				29.9071	30.0843	3.30801							TRUE	0.0225	TRUE	3	27	1	77.9503				Y	N	N	N
A4	terminal	Max3	UNKNOWN	SYBR	None				37.9203	38.0467	0.138274							TRUE	0.0233974	TRUE	3	39	1	61.9096				N	Y	Y	N
A5	terminal	Max3	UNKNOWN	SYBR	None				38.1943	38.0467	0.138274							TRUE	0.0233974	TRUE	3	39	1	63.6283				N	Y	Y	N
A6	terminal	Max3	UNKNOWN	SYBR	None				38.0254	38.0467	0.138274							TRUE	0.0233974	TRUE	3	39	1	61.7186				N	Y	Y	N
A7	terminal	Max4	UNKNOWN	SYBR	None				33.6497	33.423	0.339136							TRUE	0.15263	TRUE	3	28	1	75.8497				Y	N	N	N
A8	terminal	Max4	UNKNOWN	SYBR	None				33.5862	33.423	0.339136							TRUE	0.15263	TRUE	3	28	1	75.6588				Y	N	N	N
A9	terminal	Max4	UNKNOWN	SYBR	None				33.0331	33.423	0.339136							TRUE	0.15263	TRUE	3	32	1	75.6588				Y	N	N	N
A10	terminal	tubclin	UNKNOWN	SYBR	None				32.0935	33.0343	0.871902							TRUE	0.0225	TRUE	3	34	1	77.9503				Y	N	N	N
A11	terminal	tubclin	UNKNOWN	SYBR	None				33.1943	33.0343	0.871902							TRUE	0.0225	TRUE	3	33	1	77.7593				Y	N	N	N
A12	terminal	tubclin	UNKNOWN	SYBR	None				33.8151	33.0343	0.871902							TRUE	0.0225	TRUE	3	35	1	77.5684				Y	N	N	N
B1	axillary	tubclin	UNKNOWN	SYBR	None				33.653	33.2666	0.339332							TRUE	0.0225	TRUE	3	33	1	77.7593				Y	N	N	N
B2	axillary	tubclin	UNKNOWN	SYBR	None				33.1298	33.2666	0.339332							TRUE	0.0225	TRUE	3	32	1	78.1412				Y	N	N	N
B3	axillary	tubclin	UNKNOWN	SYBR	None				33.017	33.2666	0.339332							TRUE	0.0225	TRUE	3	30	1	78.1412				Y	N	N	N
B4	axillary	Max3	UNKNOWN	SYBR	None				33.9379	33.5886	0.349283							TRUE	0.0233974	TRUE	3	31	1	73.9401				Y	N	N	N
B5	axillary	Max3	UNKNOWN	SYBR	None				33.2394	33.5886	0.349283							TRUE	0.0233974	TRUE	3	32	1	73.9401				Y	N	N	N
B6	axillary	Max3	UNKNOWN	SYBR	None				33.5886	33.5886	0.349283							TRUE	0.0233974	TRUE	3	39	1	61.7186				N	Y	Y	N
B7	axillary	Max4	UNKNOWN	SYBR	None				35.8329	35.8178	0.0168064							TRUE	0.15263	TRUE	3	31	1	75.8497				Y	N	N	N
B8	axillary	Max4	UNKNOWN	SYBR	None				35.8207	35.8178	0.0168064							TRUE	0.15263	TRUE	3	31	1	75.8497				Y	N	N	N
B9	axillary	Max4	UNKNOWN	SYBR	None				35.7997	35.8178	0.0168064							TRUE	0.15263	TRUE	3	31	1	75.8497				Y	N	N	N
B10	axillary	tubclin	UNKNOWN	SYBR	None				30.3237	30.3366	0.105568							TRUE	0.0225	TRUE	3	27	1	78.1412				Y	N	N	N
B11	axillary	tubclin	UNKNOWN	SYBR	None				30.2381	30.3366	0.105568							TRUE	0.0225	TRUE	3	28	1	77.9503				Y	N	N	N
B12	axillary	tubclin	UNKNOWN	SYBR	None				30.448	30.3366	0.105568							TRUE	0.0225	TRUE	3	28	1	77.7593				Y	N	N	N
C1	leaf	tubclin	UNKNOWN	SYBR	None				31.5728	31.6703	0.0997526							TRUE	0.0225	TRUE	3	33	1	78.1412				Y	N	N	N
C2	leaf	tubclin	UNKNOWN	SYBR	None				31.6658	31.6703	0.0997526							TRUE	0.0225	TRUE	3	30	1	78.3322				Y	N	N	N
C3	leaf	tubclin	UNKNOWN	SYBR	None				31.7722	31.6703	0.0997526							TRUE	0.0225	TRUE	3	30	1	78.3322				Y	N	N	N
C4	leaf	Max3	UNKNOWN	SYBR	None				31.9076	32.2905	0.560419							TRUE	0.0233974	TRUE	3	39	1	61.7186				N	Y	Y	N
C5	leaf	Max3	UNKNOWN	SYBR	None				32.0302	32.2905	0.560419							TRUE	0.0233974	TRUE	3	30	1	74.322				N	N	N	N
C6	leaf	Max3	UNKNOWN	SYBR	None				32.9338	32.2905	0.560419							TRUE	0.0233974	TRUE	3	39	1	61.9096				N	Y	Y	N
C7	leaf	Max4	UNKNOWN	SYBR	None	0.130873	0.0438173	0.390892	35.2286	35.5827	0.486452		4.3224	0.667589			2.93376	TRUE	0.15263	TRUE	3	30	1	76.0407				N	N	N	N
C8	leaf	Max4	UNKNOWN	SYBR	None	0.130873	0.0438173	0.390892	35.3821	35.5827	0.486452		4.3224	0.667589			2.93376	TRUE	0.15263	TRUE	3	31	1	76.0407				N	N	N	N
C9	leaf	Max4	UNKNOWN	SYBR	None	0.130873	0.0438173	0.390892	36.1374	35.5827	0.486452		4.3224	0.667589			2.93376	TRUE	0.15263	TRUE	3	31	1	75.8497				N	N	N	N
C10	leaf	tubclin	UNKNOWN	SYBR	None				30.1051	30.3333	0.198285							TRUE	0.0225	TRUE	3	28	1	78.3322				Y	N	N	N
C11	leaf	tubclin	UNKNOWN	SYBR	None				30.4636	30.3333	0.198285							TRUE	0.0225	TRUE	3	29	1	78.1412				Y	N	N	N
C12	leaf	tubclin	UNKNOWN	SYBR	None				30.4312	30.3333	0.198285							TRUE	0.0225	TRUE	3	27	1	77.9503				Y	N	N	N
D1	stem	tubclin	UNKNOWN	SYBR	None				33.7608	33.667	0.115811							TRUE	0.0225	TRUE	3	32	1	78.3322				Y	N	N	N
D2	stem	tubclin	UNKNOWN	SYBR	None				33.5375	33.667	0.115811							TRUE	0.0225	TRUE	3	32	1	78.3322				Y	N	N	N
D3	stem	tubclin	UNKNOWN	SYBR	None				33.7025	33.667	0.115811							TRUE	0.0225	TRUE	3	30	1	78.5232				Y	N	N	N
D4	stem	Max3	UNKNOWN	SYBR	None				36.8976	36.0009	0.95255							TRUE	0.0233974	TRUE	3	33	1	79.096				Y	N	N	N
D5	stem	Max3	UNKNOWN	SYBR	None				36.1043	36.0009	0.95255							TRUE	0.0233974	TRUE	3	35	1	76.4226	62.1006			Y	N	N	Y
D6	stem	Max3	UNKNOWN	SYBR	None				35.0009	36.0009	0.95255							TRUE	0.0233974	TRUE	3	39	1	61.9096				N	Y	Y	N
D7	stem	Max4	UNKNOWN	SYBR	None				35.7402	35.5061	0.409881							TRUE	0.15263	TRUE	3	30	1	76.6136				Y	N	N	N
D8	stem	Max4	UNKNOWN	SYBR	None				35.0329	35.5061	0.409881							TRUE	0.15263	TRUE	3	30	1	76.2316				Y	N	N	N
D9	stem	Max4	UNKNOWN	SYBR	None				35.7454	35.5061	0.409881							TRUE	0.15263	TRUE	3	31	1	75.8497				Y	N	N	N
D10	stem	tubclin	UNKNOWN	SYBR	None				30.7171	30.715	0.00905406							TRUE	0.0225	TRUE	3	29	1	78.3322				Y	N	N	N
D11	stem	tubclin	UNKNOWN	SYBR	None				30.705	30.715	0.00905406							TRUE	0.0225	TRUE	3	28	1	78.1412				Y	N	N	N
D12	stem	tubclin	UNKNOWN	SYBR	None				30.7228	30.715	0.00905406							TRUE	0.0225	TRUE	3	29	1	77.7593				Y	N	N	N
E1	flower	tubclin	UNKNOWN	SYBR	None				38.6295	38.6025	0.0294242							TRUE	0.0225	TRUE	3	36	1	78.3322				Y	N	N	N
E2	flower	tubclin	UNKNOWN	SYBR	None				38.5712	38.6025	0.0294242							TRUE	0.0225	TRUE	3	36	1	73.1763				Y	N	N	N
E3	flower	tubclin	UNKNOWN	SYBR	None				38.6069	38.6025	0.0294242							TRUE	0.0225	TRUE	3	36	1	78.5232				Y	N	N	N
E4	flower	Max3	UNKNOWN	SYBR	None				33.8407	34.1849	0.338624							TRUE	0.0233974	TRUE	3	39	1	61.9096				N	N	Y	N
E5	flower	Max3	UNKNOWN	SYBR	None				34.1964	34.1849	0.338624							TRUE	0.0233974	TRUE	3	39	1	61.9096				N	Y	Y	N
E6	flower	Max3	UNKNOWN	SYBR	None				34.5176	34.1849	0.338624							TRUE	0.0233974	TRUE	3	32	1	74.1311				N	N	N	N
E7	flower	Max4	UNKNOWN	SYBR	None	6.00025	1.24096	29.0122	34.7576	35.5062	0.706444		-1.19637	0.961491			-2.58502	TRUE	0.15263	TRUE	3	30	1	76.2316	80.6237			Y	N	N	Y
E8	flower	Max4	UNKNOWN	SYBR	None	6.00025	1.24096	29.0122	36.1612	35.5062	0.706444		-1.19637	0.961491			-2.58502	TRUE	0.15263	TRUE	3	31	1	76.0407				Y	N	N	N
E9	flower	Max4	UNKNOWN	SYBR	None	6.00025	1.24096	29.0122	35.5996	35.5062	0.706444		-1.19637	0.961491			-2.58502	TRUE	0.15263	TRUE	3	31	1	76.2316				Y	N	N	N
E10	flower	tubclin	UNKNOWN	SYBR	None				35.0052	35.5125	0.492129							TRUE	0.0225	TRUE	3	33	1	78.7141				Y	N	N	N
E11	flower	tubclin	UNKNOWN	SYBR	None				35.5444	35.5125	0.492129							TRUE	0.0225	TRUE	3	34	1	78.3322	73.7492			Y	N	N	Y
E12	flower	tubclin	UNKNOWN	SYBR	None				35.988	35.5125	0.492129							TRUE	0.0225	TRUE	3	32	1	78.1412				Y	N	N	N
F1	root	tubclin	UNKNOWN	SYBR	None				32.8428	32.5166	0.45239							TRUE	0.0225	TRUE	3	31	1	78.1412				Y	N	N	N
F2	root	tubclin	UNKNOWN	SYBR	None				32.0001	32.5166	0.45239							TRUE	0.0225	TRUE	3	30	1	78.3322				Y	N	N	N
F3	root	tubclin	UNKNOWN	SYBR	None				32.7068	32.5166	0.45239							TRUE	0.0225	TRUE	3	30	1	78.3322				Y	N	N	N
F4	root	Max3	UNKNOWN	SYBR	None				33.2724	33.889	0.572838							TRUE	0.0233974	TRUE	3	39	1	61.9096				N	Y	Y	N
F5	root	Max3	UNKNOWN	SYBR	None				33.9898	33.889	0.572838							TRUE	0.0233974	TRUE	3	32	1	75.4678				N	N	N	N
F6	root	Max3	UNKNOWN	SYBR	None				34.4047	33.889	0.572838							TRUE	0.0233974	TRUE	3	39	1	62.1006				N	Y	Y	N
F7	root	Max4	UNKNOWN	SYBR	None	0.659231	0.321387	1.35222	33.6506	33.6063	0.0771633		1.98979	0.438324			0.601144	TRUE	0.15263	TRUE	3	29	1	81.5785	76.0407			N	N	N	Y
F8	root	Max4	UNKNOWN	SYBR	None	0.659231	0.321387	1.35222	33.5172	33.6063	0.0771633		1.98979	0.438324			0.601144	TRUE	0.15263	TRUE	3	29	1	81.3876	75.8497			N	N	N	Y
F9	root	Max4	UNKNOWN	SYBR	None	0.659231	0.321387	1.35222	33.6512	33.6063	0.0771633		1.98979	0.438324			0.601144	TRUE	0.15263	TRUE	3	29	1	81.1966				N	N	N	N
F10	root	tubclin	UNKNOWN	SYBR	None				30.3884	30.3556	0.0288611							TRUE	0.0225	TRUE	3	28	1	78.3322				Y	N	N	N
F11	root	tubclin	UNKNOWN	SYBR	None				30.3345	30.3556	0.0288611							TRUE	0.0225	TRUE	3	31	1	77.9503				Y	N	N	N
F12	root	tubclin	UNKNOWN	SYBR	None				30.3437	30.3556	0.0288611							TRUE	0.0225	TRUE	3	28	1	77.7593				Y	N	N	N
Analysis Type	Singleplex
Endogenous Control	tubclin
RQ Min/Max Confidence Level	95.0
Reference Sample	terminal

## Sheet: Topping
Block Type	96alum
Chemistry	SYBR_GREEN
Experiment File Name	D:\20220401-2.eds
Experiment Run End Time	2022-04-01 16:43:14
Instrument Type	sds7500
Passive Reference	ROX
Well	Sample Name	Target Name	Task	Reporter	Quencher	RQ	RQ Min	RQ Max	Cт	Cт Mean	Cт SD	ΔCт	ΔCт Mean	ΔCт SE	HK Control ΔCт Mean	HK Control ΔCт SE	ΔΔCт	Automatic Ct Threshold	Ct Threshold	Automatic Baseline	Baseline Start	Baseline End	Efficiency	Tm1	Tm2	Tm3	Comments	HIGHSD	NOAMP	OUTLIERRG	EXPFAIL	MTP
A1	T+1d	tubclin	UNKNOWN	SYBR	None				27.9044	27.5111	0.347633							TRUE	0.27832	TRUE	3	26	1	77.6972				Y	N	N	N	N
A2	T+1d	tubclin	UNKNOWN	SYBR	None				27.2451	27.5111	0.347633							TRUE	0.27832	TRUE	3	24	1	77.8855				Y	N	N	N	N
A3	T+1d	tubclin	UNKNOWN	SYBR	None				27.3838	27.5111	0.347633							TRUE	0.27832	TRUE	3	23	1	78.0737				Y	N	N	N	N
A4	T+1d	Max1	UNKNOWN	SYBR	None				35.1313	35.5357	0.404392							TRUE	0.0358516	TRUE	3	34	1	73.367				Y	N	N	N	N
A5	T+1d	Max1	UNKNOWN	SYBR	None				35.5357	35.5357	0.404392							TRUE	0.0358516	TRUE	3	39	1	64.1419	61.6944	87.2989		N	N	N	Y	Y
A6	T+1d	Max1	UNKNOWN	SYBR	None				35.9401	35.5357	0.404392							TRUE	0.0358516	TRUE	3	31	1	81.2743	73.9318			Y	N	N	N	Y
A7	T+5d	Max3	UNKNOWN	SYBR	None				38.9584	38.5074	0.433337							TRUE	0.0992505	TRUE	3	31	1	79.5799	73.1788			Y	N	N	N	Y
A8	T+5d	Max3	UNKNOWN	SYBR	None				38.4697	38.5074	0.433337							TRUE	0.0992505	TRUE	3	35	1	72.9905	61.8827			Y	N	N	N	Y
A9	T+5d	Max3	UNKNOWN	SYBR	None				38.0942	38.5074	0.433337							TRUE	0.0992505	TRUE	3	33	1	80.5212	62.0709			Y	N	N	N	Y
A10	T+5d	tubclin	UNKNOWN	SYBR	None				25.4087	25.561	0.321398							TRUE	0.27832	TRUE	3	20	1	77.6972				N	N	N	N	N
A11	T+5d	tubclin	UNKNOWN	SYBR	None				25.4386	25.561	0.321398							TRUE	0.27832	TRUE	3	20	1	77.6972				N	N	N	N	N
A12	T+5d	tubclin	UNKNOWN	SYBR	None				25.6656	25.561	0.321398							TRUE	0.27832	TRUE	3	22	1	77.5089				N	N	N	N	N
B1	T+3d	tubclin	UNKNOWN	SYBR	None				26.3813	25.5137	0.407842							TRUE	0.27832	TRUE	3	24	1	77.8855				N	N	N	N	N
B2	T+3d	tubclin	UNKNOWN	SYBR	None				25.6554	25.5137	0.407842							TRUE	0.27832	TRUE	3	23	1	78.0737				N	N	N	N	N
B3	T+3d	tubclin	UNKNOWN	SYBR	None				25.2617	25.5137	0.407842							TRUE	0.27832	TRUE	3	21	1	78.262				N	N	N	N	N
B4	T+3d	Max1	UNKNOWN	SYBR	None				30.9301	30.9533	0.0394756							TRUE	0.0358516	TRUE	3	29	1	81.4626				Y	N	N	N	N
B5	T+3d	Max1	UNKNOWN	SYBR	None				30.9308	30.9533	0.0394756							TRUE	0.0358516	TRUE	3	29	1	81.4626				Y	N	N	N	N
B6	T+3d	Max1	UNKNOWN	SYBR	None				30.9988	30.9533	0.0394756							TRUE	0.0358516	TRUE	3	29	1	81.4626				Y	N	N	N	N
B7	T+1d	Max4	UNKNOWN	SYBR	None				35.5191	35.1263	0.358306							TRUE	0.0238424	TRUE	3	34	1	75.6263				Y	N	N	N	N
B8	T+1d	Max4	UNKNOWN	SYBR	None				34.8173	35.1263	0.358306							TRUE	0.0238424	TRUE	3	32	1	81.2743	75.0614			Y	N	N	N	Y
B9	T+1d	Max4	UNKNOWN	SYBR	None				35.0427	35.1263	0.358306							TRUE	0.0238424	TRUE	3	35	1	75.2497	80.8978			Y	N	N	N	Y
B10	T+1d	tubclin	UNKNOWN	SYBR	None				26.7461	26.5111	0.244984							TRUE	0.27832	TRUE	3	20	1	78.0737				Y	N	N	N	N
B11	T+1d	tubclin	UNKNOWN	SYBR	None				26.2572	26.5111	0.244984							TRUE	0.27832	TRUE	3	21	1	77.8855				Y	N	N	N	N
B12	T+1d	tubclin	UNKNOWN	SYBR	None				26.5299	26.5111	0.244984							TRUE	0.27832	TRUE	3	21	1	77.6972				Y	N	N	N	N
C1	T+5d	tubclin	UNKNOWN	SYBR	None				25.1458	25.333	0.212448							TRUE	0.27832	TRUE	3	24	1	78.0737				N	N	Y	N	N
C2	T+5d	tubclin	UNKNOWN	SYBR	None				25.5639	25.333	0.212448							TRUE	0.27832	TRUE	3	22	1	78.262				N	N	N	N	N
C3	T+5d	tubclin	UNKNOWN	SYBR	None				25.2893	25.333	0.212448							TRUE	0.27832	TRUE	3	20	1	78.262				N	N	N	N	N
C4	T+5d	Max1	UNKNOWN	SYBR	None				29.9552	29.9445	0.0118598							TRUE	0.0358516	TRUE	3	28	1	81.4626				N	N	Y	N	N
C5	T+5d	Max1	UNKNOWN	SYBR	None				29.9466	29.9445	0.0118598							TRUE	0.0358516	TRUE	3	27	1	81.6508				N	N	N	N	N
C6	T+5d	Max1	UNKNOWN	SYBR	None				29.9318	29.9445	0.0118598							TRUE	0.0358516	TRUE	3	27	1	81.6508				N	N	N	N	N
C7	T+3d	Max4	UNKNOWN	SYBR	None				32.7493	32.8884	0.123527							TRUE	0.0238424	TRUE	3	30	1	81.4626	75.438			Y	N	N	N	Y
C8	T+3d	Max4	UNKNOWN	SYBR	None				32.9854	32.8884	0.123527							TRUE	0.0238424	TRUE	3	31	1	81.4626	75.0614			Y	N	N	N	Y
C9	T+3d	Max4	UNKNOWN	SYBR	None				32.9305	32.8884	0.123527							TRUE	0.0238424	TRUE	3	32	1	75.6263	81.4626			Y	N	N	N	Y
C10	T+3d	tubclin	UNKNOWN	SYBR	None				25.1883	25.5137	0.407842							TRUE	0.27832	TRUE	3	19	1	78.262				N	N	N	N	N
C11	T+3d	tubclin	UNKNOWN	SYBR	None				25.3522	25.5137	0.407842							TRUE	0.27832	TRUE	3	19	1	78.0737				N	N	N	N	N
C12	T+3d	tubclin	UNKNOWN	SYBR	None				25.1719	25.5137	0.407842							TRUE	0.27832	TRUE	3	20	1	77.8855				N	N	N	N	N
D1	T+1d	tubclin	UNKNOWN	SYBR	None				26.507	26.7111	0.520201							TRUE	0.27832	TRUE	3	23	1	78.262				Y	N	N	N	N
D2	T+1d	tubclin	UNKNOWN	SYBR	None				26.8005	26.7111	0.520201							TRUE	0.27832	TRUE	3	24	1	78.262				Y	N	N	N	N
D3	T+1d	tubclin	UNKNOWN	SYBR	None				26.1835	26.7111	0.520201							TRUE	0.27832	TRUE	3	21	1	78.4503				Y	N	N	N	N
D4	T+1d	Max2	UNKNOWN	SYBR	None				30.9567	30.9568	0.0110797							TRUE	0.561847	TRUE	3	24	1	82.7804				N	N	N	N	N
D5	T+1d	Max2	UNKNOWN	SYBR	None				30.9458	30.9568	0.0110797							TRUE	0.561847	TRUE	3	25	1	82.7804				N	N	Y	N	N
D6	T+1d	Max2	UNKNOWN	SYBR	None				30.9679	30.9568	0.0110797							TRUE	0.561847	TRUE	3	24	1	82.5922				N	N	N	N	N
D7	T+5d	Max4	UNKNOWN	SYBR	None				32.6221	32.5537	0.360087							TRUE	0.0238424	TRUE	3	29	1	75.6263	81.2743			Y	N	N	N	Y
D8	T+5d	Max4	UNKNOWN	SYBR	None				32.1643	32.5537	0.360087							TRUE	0.0238424	TRUE	3	30	1	76.3793				Y	N	N	N	N
D9	T+5d	Max4	UNKNOWN	SYBR	None				32.8747	32.5537	0.360087							TRUE	0.0238424	TRUE	3	30	1	80.333	75.438			Y	N	N	N	Y
D10	T+5d	tubclin	UNKNOWN	SYBR	None				25.3011	25.561	0.321398							TRUE	0.27832	TRUE	3	20	1	78.262				N	N	N	N	N
D11	T+5d	tubclin	UNKNOWN	SYBR	None				25.428	25.561	0.321398							TRUE	0.27832	TRUE	3	20	1	78.0737				N	N	N	N	N
D12	T+5d	tubclin	UNKNOWN	SYBR	None				25.4694	25.561	0.321398							TRUE	0.27832	TRUE	3	20	1	77.8855				N	N	N	N	N
E1	T+3d	tubclin	UNKNOWN	SYBR	None				25.5508	25.4437	0.362858							TRUE	0.27832	TRUE	3	22	1	78.262				N	N	N	N	N
E2	T+3d	tubclin	UNKNOWN	SYBR	None				25.741	25.4437	0.362858							TRUE	0.27832	TRUE	3	21	1	78.262				N	N	N	N	N
E3	T+3d	tubclin	UNKNOWN	SYBR	None				25.0394	25.4437	0.362858							TRUE	0.27832	TRUE	3	21	1	78.4503				N	N	N	N	N
E4	T+3d	Max2	UNKNOWN	SYBR	None	1.26879	0.87598	1.83774	29.8877	29.656	0.376882		4.14225	0.247402			-0.34345	TRUE	0.561847	TRUE	3	23	1	82.5922				N	N	N	N	N
E5	T+3d	Max2	UNKNOWN	SYBR	None	1.26879	0.87598	1.83774	29.2211	29.656	0.376882		4.14225	0.247402			-0.34345	TRUE	0.561847	TRUE	3	23	1	82.5922				N	N	N	N	N
E6	T+3d	Max2	UNKNOWN	SYBR	None	1.26879	0.87598	1.83774	29.8591	29.656	0.376882		4.14225	0.247402			-0.34345	TRUE	0.561847	TRUE	3	23	1	82.4039				N	N	N	N	N
E7	CK	Max1	UNKNOWN	SYBR	None				31.3556	31.5516	0.174321							TRUE	0.0358516	TRUE	3	29	1	81.6508				Y	N	N	N	N
E8	CK	Max1	UNKNOWN	SYBR	None				31.6893	31.5516	0.174321							TRUE	0.0358516	TRUE	3	30	1	81.6508				Y	N	N	N	N
E9	CK	Max1	UNKNOWN	SYBR	None				31.6098	31.5516	0.174321							TRUE	0.0358516	TRUE	3	29	1	81.6508				Y	N	N	N	N
E10	CK	tubclin	UNKNOWN	SYBR	None				26.8435	26.8752	0.183475							TRUE	0.27832	TRUE	3	21	1	78.262				N	N	N	N	N
E11	CK	tubclin	UNKNOWN	SYBR	None				26.8599	26.8752	0.183475							TRUE	0.27832	TRUE	3	21	1	78.0737				N	N	N	N	N
E12	CK	tubclin	UNKNOWN	SYBR	None				26.7857	26.8752	0.183475							TRUE	0.27832	TRUE	3	21	1	77.8855				N	N	N	N	N
F1	T+5d	tubclin	UNKNOWN	SYBR	None				26.0429	25.561	0.321398							TRUE	0.27832	TRUE	3	23	1	78.0737				N	N	N	N	N
F2	T+5d	tubclin	UNKNOWN	SYBR	None				25.4484	25.561	0.321398							TRUE	0.27832	TRUE	3	22	1	78.262				N	N	N	N	N
F3	T+5d	tubclin	UNKNOWN	SYBR	None				25.3274	25.561	0.321398							TRUE	0.27832	TRUE	3	20	1	78.0737				N	N	N	N	N
F4	T+5d	Max2	UNKNOWN	SYBR	None	1.09929	0.88583	1.36419	30.0951	29.9101	0.19114		4.34913	0.144174			-0.136572	TRUE	0.561847	TRUE	3	24	1	82.5922				N	N	N	N	N
F5	T+5d	Max2	UNKNOWN	SYBR	None	1.09929	0.88583	1.36419	29.7134	29.9101	0.19114		4.34913	0.144174			-0.136572	TRUE	0.561847	TRUE	3	23	1	82.5922				N	N	N	N	N
F6	T+5d	Max2	UNKNOWN	SYBR	None	1.09929	0.88583	1.36419	29.9218	29.9101	0.19114		4.34913	0.144174			-0.136572	TRUE	0.561847	TRUE	3	23	1	82.4039				N	N	N	N	N
F7	CK	Max2	UNKNOWN	SYBR	None	0.595194	0.484988	0.730442	31.9597	32.1094	0.218354		5.23427	0.136741			0.748568	TRUE	0.561847	TRUE	3	25	1	82.5922				N	N	N	N	N
F8	CK	Max2	UNKNOWN	SYBR	None	0.595194	0.484988	0.730442	32.0086	32.1094	0.218354		5.23427	0.136741			0.748568	TRUE	0.561847	TRUE	3	25	1	82.7804				N	N	N	N	N
F9	CK	Max2	UNKNOWN	SYBR	None	0.595194	0.484988	0.730442	32.36	32.1094	0.218354		5.23427	0.136741			0.748568	TRUE	0.561847	TRUE	3	26	1	82.5922				N	N	N	N	N
F10	CK	tubclin	UNKNOWN	SYBR	None				26.7942	26.8752	0.183475							TRUE	0.27832	TRUE	3	21	1	78.262				N	N	N	N	N
F11	CK	tubclin	UNKNOWN	SYBR	None				27.3134	26.8752	0.183475							TRUE	0.27832	TRUE	3	24	1	78.0737				N	N	N	N	N
F12	CK	tubclin	UNKNOWN	SYBR	None				26.7801	26.8752	0.183475							TRUE	0.27832	TRUE	3	21	1	77.8855				N	N	N	N	N
G1	T+1d	tubclin	UNKNOWN	SYBR	None				27.2986	26.7111	0.520201							TRUE	0.27832	TRUE	3	25	1	77.8855				Y	N	N	N	N
G2	T+1d	tubclin	UNKNOWN	SYBR	None				26.6269	26.7111	0.520201							TRUE	0.27832	TRUE	3	23	1	78.0737				Y	N	N	N	N
G3	T+1d	tubclin	UNKNOWN	SYBR	None				26.28	26.7111	0.520201							TRUE	0.27832	TRUE	3	22	1	78.262				Y	N	N	N	N
G4	T+1d	Max3	UNKNOWN	SYBR	None				35.9285	35.9285	0.546808							TRUE	0.0992505	TRUE	3	39	1	61.8827				N	Y	N	Y	N
G5	T+1d	Max3	UNKNOWN	SYBR	None				35.3817	35.9285	0.546808							TRUE	0.0992505	TRUE	3	31	1	74.6849				Y	N	N	N	N
G6	T+1d	Max3	UNKNOWN	SYBR	None				36.4753	35.9285	0.546808							TRUE	0.0992505	TRUE	3	32	1	73.9318				Y	N	N	N	N
G7	CK	Max3	UNKNOWN	SYBR	None				36.6535	36.4136	0.239861							TRUE	0.0992505	TRUE	3	33	1	73.9318	62.0709			N	N	N	N	Y
G8	CK	Max3	UNKNOWN	SYBR	None				36.1737	36.4136	0.239861							TRUE	0.0992505	TRUE	3	32	1	74.4966				N	N	N	N	N
G9	CK	Max3	UNKNOWN	SYBR	None				36.4136	36.4136	0.239861							TRUE	0.0992505	TRUE	3	39	1	61.8827				N	Y	N	Y	N
G10	CK	tubclin	UNKNOWN	SYBR	None				26.817	26.8752	0.183475							TRUE	0.27832	TRUE	3	22	1	78.0737				N	N	N	N	N
G11	CK	tubclin	UNKNOWN	SYBR	None				26.8977	26.8752	0.183475							TRUE	0.27832	TRUE	3	21	1	77.8855				N	N	N	N	N
G12	CK	tubclin	UNKNOWN	SYBR	None				26.8916	26.8752	0.183475							TRUE	0.27832	TRUE	3	21	1	77.6972				N	N	N	N	N
H1	T+3d	tubclin	UNKNOWN	SYBR	None				26.0632	25.5137	0.407842							TRUE	0.27832	TRUE	3	23	1	77.6972				N	N	N	N	N
H2	T+3d	tubclin	UNKNOWN	SYBR	None				25.8785	25.5137	0.407842							TRUE	0.27832	TRUE	3	22	1	77.5089				N	N	N	N	N
H3	T+3d	tubclin	UNKNOWN	SYBR	None				25.2897	25.5137	0.407842							TRUE	0.27832	TRUE	3	21	1	78.0737				N	N	N	N	N
H4	T+3d	Max3	UNKNOWN	SYBR	None				34.7392	35.4943	0.662967							TRUE	0.0992505	TRUE	3	39	1	61.6944				N	N	N	Y	N
H5	T+3d	Max3	UNKNOWN	SYBR	None				35.7632	35.4943	0.662967							TRUE	0.0992505	TRUE	3	32	1	74.8732				N	N	N	N	N
H6	T+3d	Max3	UNKNOWN	SYBR	None				35.9806	35.4943	0.662967							TRUE	0.0992505	TRUE	3	35	1	73.1788	62.0709			N	N	N	N	Y
H7	CK	Max4	UNKNOWN	SYBR	None				34.1966	34.1995	0.0240739							TRUE	0.0238424	TRUE	3	34	1	75.0614				Y	N	N	N	N
H8	CK	Max4	UNKNOWN	SYBR	None				34.2249	34.1995	0.0240739							TRUE	0.0238424	TRUE	3	32	1	75.438				Y	N	N	N	N
H9	CK	Max4	UNKNOWN	SYBR	None				34.177	34.1995	0.0240739							TRUE	0.0238424	TRUE	3	35	1	74.8732				Y	N	Y	N	N
H10	CK	tubclin	UNKNOWN	SYBR	None				26.62	26.8752	0.183475							TRUE	0.27832	TRUE	3	21	1	77.8855				N	N	N	N	N
H11	CK	tubclin	UNKNOWN	SYBR	None				26.7584	26.8752	0.183475							TRUE	0.27832	TRUE	3	21	1	77.8855				N	N	N	N	N
H12	CK	tubclin	UNKNOWN	SYBR	None				27.1407	26.8752	0.183475							TRUE	0.27832	TRUE	3	22	1	77.5089				N	N	N	N	N
Analysis Type	Singleplex
Endogenous Control	tubclin
RQ Min/Max Confidence Level	95.0
Reference Sample	T+1d

## Sheet: MAX1-hormone
Block Type	96alum
Chemistry	SYBR_GREEN
Experiment File Name	D:\20220331-1.eds
Experiment Run End Time	2022-03-31 13:02:29
Instrument Type	sds7500
Passive Reference	ROX
Well	Sample Name	Target Name	Task	Reporter	Quencher	RQ	RQ Min	RQ Max	Cт	Cт Mean	Cт SD	ΔCт	ΔCт Mean	ΔCт SE	HK Control ΔCт Mean	HK Control ΔCт SE	ΔΔCт	Automatic Ct Threshold	Ct Threshold	Automatic Baseline	Baseline Start	Baseline End	Efficiency	Tm1	Tm2	Tm3	Comments	HIGHSD	NOAMP	OUTLIERRG	EXPFAIL	MTP
A1	ABA-1d	tubclin	UNKNOWN	SYBR	None				31.0241	30.1691	0.893213							TRUE	0.388772	TRUE	3	29	1	77.6648				Y	N	N	N	N
A2	ABA-1d	tubclin	UNKNOWN	SYBR	None				30.2412	30.1691	0.893213							TRUE	0.388772	TRUE	3	27	1	77.8547				Y	N	N	N	N
A3	ABA-1d	tubclin	UNKNOWN	SYBR	None				29.242	30.1691	0.893213							TRUE	0.388772	TRUE	3	24	1	78.0447				Y	N	N	N	N
A4	ABA-1d	Max1	UNKNOWN	SYBR	None				38.7732	38.1707	0.624047							TRUE	0.0244637	TRUE	3	39	1	64.1788				N	Y	N	Y	N
A5	ABA-1d	Max1	UNKNOWN	SYBR	None				37.5272	38.1707	0.624047							TRUE	0.0244637	TRUE	3	39	1	64.9385				N	Y	N	Y	N
A6	ABA-1d	Max1	UNKNOWN	SYBR	None				38.2116	38.1707	0.624047							TRUE	0.0244637	TRUE	3	39	1	61.7095	65.3184			N	Y	N	Y	Y
A7	IAA-5d	Max1	UNKNOWN	SYBR	None				35.2435	35.0143	0.90735							TRUE	0.0244637	TRUE	3	30	1	81.2737				Y	N	N	N	N
A8	IAA-5d	Max1	UNKNOWN	SYBR	None				34.0143	35.0143	0.90735							TRUE	0.0244637	TRUE	3	39	1	61.8994				N	N	N	Y	N
A9	IAA-5d	Max1	UNKNOWN	SYBR	None				35.785	35.0143	0.90735							TRUE	0.0244637	TRUE	3	35	1	79.9441				Y	N	N	N	N
A10	IAA-5d	tubclin	UNKNOWN	SYBR	None				27.7134	27.8436	0.16427							TRUE	0.388772	TRUE	3	23	1	77.6648				N	N	N	N	N
A11	IAA-5d	tubclin	UNKNOWN	SYBR	None				28.0282	27.8436	0.16427							TRUE	0.388772	TRUE	3	23	1	77.6648				N	N	N	N	N
A12	IAA-5d	tubclin	UNKNOWN	SYBR	None				27.7891	27.8436	0.16427							TRUE	0.388772	TRUE	3	21	1	77.4749				N	N	N	N	N
B1	ABA-3d	tubclin	UNKNOWN	SYBR	None				27.9482	27.0019	0.821158							TRUE	0.388772	TRUE	3	25	1	77.8547				Y	N	N	N	N
B2	ABA-3d	tubclin	UNKNOWN	SYBR	None				26.5813	27.0019	0.821158							TRUE	0.388772	TRUE	3	23	1	78.0447				Y	N	N	N	N
B3	ABA-3d	tubclin	UNKNOWN	SYBR	None				26.4764	27.0019	0.821158							TRUE	0.388772	TRUE	3	22	1	78.2346				Y	N	N	N	N
B4	ABA-3d	Max1	UNKNOWN	SYBR	None				34.5484	33.4875	1.01731							TRUE	0.0244637	TRUE	3	33	1	81.4637				Y	N	N	N	N
B5	ABA-3d	Max1	UNKNOWN	SYBR	None				33.3939	33.4875	1.01731							TRUE	0.0244637	TRUE	3	4	1	61.7095				Y	N	N	N	N
B6	ABA-3d	Max1	UNKNOWN	SYBR	None				32.5203	33.4875	1.01731							TRUE	0.0244637	TRUE	3	30	1	81.4637				Y	N	N	N	N
B7	Suc-1d	Max1	UNKNOWN	SYBR	None				34.6617	34.8047	0.269538							TRUE	0.0244637	TRUE	3	39	1	62.2793				N	Y	N	Y	N
B8	Suc-1d	Max1	UNKNOWN	SYBR	None				35.1156	34.8047	0.269538							TRUE	0.0244637	TRUE	3	39	1	61.8994				N	Y	N	Y	N
B9	Suc-1d	Max1	UNKNOWN	SYBR	None				34.6367	34.8047	0.269538							TRUE	0.0244637	TRUE	3	32	1	81.4637				N	N	N	N	N
B10	Suc-1d	tubclin	UNKNOWN	SYBR	None				27.2084	27.168	0.374496							TRUE	0.388772	TRUE	3	21	1	78.0447				N	N	N	N	N
B11	Suc-1d	tubclin	UNKNOWN	SYBR	None				26.7749	27.168	0.374496							TRUE	0.388772	TRUE	3	20	1	77.8547				N	N	N	N	N
B12	Suc-1d	tubclin	UNKNOWN	SYBR	None				27.5206	27.168	0.374496							TRUE	0.388772	TRUE	3	21	1	77.6648				N	N	N	N	N
C1	ABA-5d	tubclin	UNKNOWN	SYBR	None				29.363	28.6017	0.948377							TRUE	0.388772	TRUE	3	27	1	78.0447				Y	N	N	N	N
C2	ABA-5d	tubclin	UNKNOWN	SYBR	None				28.9027	28.6017	0.948377							TRUE	0.388772	TRUE	3	25	1	78.2346				Y	N	N	N	N
C3	ABA-5d	tubclin	UNKNOWN	SYBR	None				27.5393	28.6017	0.948377							TRUE	0.388772	TRUE	3	23	1	78.4246				Y	N	N	N	N
C4	ABA-5d	Max1	UNKNOWN	SYBR	None				38.6617	38.278	0.466323							TRUE	0.0244637	TRUE	3	39	1	61.7095				N	Y	N	Y	N
C5	ABA-5d	Max1	UNKNOWN	SYBR	None				38.4134	38.278	0.466323							TRUE	0.0244637	TRUE	3	39	1	61.5196	70.257			N	Y	N	Y	Y
C6	ABA-5d	Max1	UNKNOWN	SYBR	None				37.759	38.278	0.466323							TRUE	0.0244637	TRUE	3	39	1	61.8994				N	Y	N	Y	N
C7	Suc-3d	Max1	UNKNOWN	SYBR	None				31.6233	31.9082	0.402935		6.66174	0.278049				TRUE	0.0244637	TRUE	3	29	1	81.6536				N	N	N	N	N
C8	Suc-3d	Max1	UNKNOWN	SYBR	None				31.7322	31.9082	0.402935		6.66174	0.278049				TRUE	0.0244637	TRUE	3	29	1	81.4637				N	N	N	N	N
C9	Suc-3d	Max1	UNKNOWN	SYBR	None				32.3693	31.9082	0.402935		6.66174	0.278049				TRUE	0.0244637	TRUE	3	30	1	81.4637				N	N	N	N	N
C10	Suc-3d	tubclin	UNKNOWN	SYBR	None				25.3006	25.2465	0.263775							TRUE	0.388772	TRUE	3	19	1	78.2346				N	N	N	N	N
C11	Suc-3d	tubclin	UNKNOWN	SYBR	None				25.4791	25.2465	0.263775							TRUE	0.388772	TRUE	3	19	1	78.0447				N	N	N	N	N
C12	Suc-3d	tubclin	UNKNOWN	SYBR	None				24.9599	25.2465	0.263775							TRUE	0.388772	TRUE	3	17	1	77.8547				N	N	N	N	N
D1	6BA-1d	tubclin	UNKNOWN	SYBR	None				26.1741	26.1983	0.509464							TRUE	0.388772	TRUE	3	21	1	78.2346				Y	N	N	N	N
D2	6BA-1d	tubclin	UNKNOWN	SYBR	None				26.7194	26.1983	0.509464							TRUE	0.388772	TRUE	3	23	1	78.2346				Y	N	N	N	N
D3	6BA-1d	tubclin	UNKNOWN	SYBR	None				25.7013	26.1983	0.509464							TRUE	0.388772	TRUE	3	20	1	78.4246				Y	N	N	N	N
D4	6BA-1d	Max1	UNKNOWN	SYBR	None				29.5263	30.6116	1.17887		4.41338	0.741462				TRUE	0.0244637	TRUE	3	27	1	81.4637				Y	N	N	N	N
D5	6BA-1d	Max1	UNKNOWN	SYBR	None				31.8658	30.6116	1.17887		4.41338	0.741462				TRUE	0.0244637	TRUE	3	30	1	81.8436				Y	N	N	N	N
D6	6BA-1d	Max1	UNKNOWN	SYBR	None				30.4428	30.6116	1.17887		4.41338	0.741462				TRUE	0.0244637	TRUE	3	28	1	81.6536				Y	N	N	N	N
D7	Suc-5d	Max1	UNKNOWN	SYBR	None				Undetermined	34.1292	0.348237		7.55535	0.253275				TRUE	0.0244637	TRUE	3	39	1	61.8994	81.8436			N	Y	N	Y	Y
D8	Suc-5d	Max1	UNKNOWN	SYBR	None				33.8829	34.1292	0.348237		7.55535	0.253275				TRUE	0.0244637	TRUE	3	32	1	81.8436				N	N	N	N	N
D9	Suc-5d	Max1	UNKNOWN	SYBR	None				34.3754	34.1292	0.348237		7.55535	0.253275				TRUE	0.0244637	TRUE	3	32	1	81.6536				N	N	N	N	N
D10	Suc-5d	tubclin	UNKNOWN	SYBR	None				26.5105	26.5738	0.102673							TRUE	0.388772	TRUE	3	20	1	78.2346				N	N	N	N	N
D11	Suc-5d	tubclin	UNKNOWN	SYBR	None				26.6923	26.5738	0.102673							TRUE	0.388772	TRUE	3	19	1	78.0447				N	N	N	N	N
D12	Suc-5d	tubclin	UNKNOWN	SYBR	None				26.5187	26.5738	0.102673							TRUE	0.388772	TRUE	3	20	1	77.8547				N	N	N	N	N
E1	6BA-3d	tubclin	UNKNOWN	SYBR	None				25.3765	25.1796	0.455313							TRUE	0.388772	TRUE	3	22	1	78.2346				N	N	N	N	N
E2	6BA-3d	tubclin	UNKNOWN	SYBR	None				25.5034	25.1796	0.455313							TRUE	0.388772	TRUE	3	22	1	78.4246				N	N	N	N	N
E3	6BA-3d	tubclin	UNKNOWN	SYBR	None				24.659	25.1796	0.455313							TRUE	0.388772	TRUE	3	19	1	78.4246				N	N	N	N	N
E4	6BA-3d	Max1	UNKNOWN	SYBR	None				30.2993	29.9213	0.330648		4.74166	0.324878				TRUE	0.0244637	TRUE	3	29	1	81.6536				N	N	N	N	N
E5	6BA-3d	Max1	UNKNOWN	SYBR	None				29.7785	29.9213	0.330648		4.74166	0.324878				TRUE	0.0244637	TRUE	3	28	1	81.6536				N	N	N	N	N
E6	6BA-3d	Max1	UNKNOWN	SYBR	None				29.686	29.9213	0.330648		4.74166	0.324878				TRUE	0.0244637	TRUE	3	28	1	81.6536				N	N	N	N	N
E7	GR24-1d	Max1	UNKNOWN	SYBR	None				38.855	38.0905	0.836742							TRUE	0.0244637	TRUE	3	39	1	62.0894				N	Y	N	Y	N
E8	GR24-1d	Max1	UNKNOWN	SYBR	None				37.1966	38.0905	0.836742							TRUE	0.0244637	TRUE	3	39	1	61.8994	81.0838			N	Y	N	Y	Y
E9	GR24-1d	Max1	UNKNOWN	SYBR	None				38.2199	38.0905	0.836742							TRUE	0.0244637	TRUE	3	39	1	61.8994	78.9944			N	Y	N	Y	Y
E10	GR24-1d	tubclin	UNKNOWN	SYBR	None				28.5373	28.3374	0.197293							TRUE	0.388772	TRUE	3	22	1	78.4246				N	N	N	N	N
E11	GR24-1d	tubclin	UNKNOWN	SYBR	None				28.1428	28.3374	0.197293							TRUE	0.388772	TRUE	3	21	1	78.2346				N	N	N	N	N
E12	GR24-1d	tubclin	UNKNOWN	SYBR	None				28.3321	28.3374	0.197293							TRUE	0.388772	TRUE	3	22	1	77.8547				N	N	N	N	N
F1	6BA-5d	tubclin	UNKNOWN	SYBR	None				30.2398	30.3742	0.20353							TRUE	0.388772	TRUE	3	27	1	78.0447				N	N	N	N	N
F2	6BA-5d	tubclin	UNKNOWN	SYBR	None				30.6083	30.3742	0.20353							TRUE	0.388772	TRUE	3	27	1	78.2346				N	N	N	N	N
F3	6BA-5d	tubclin	UNKNOWN	SYBR	None				30.2744	30.3742	0.20353							TRUE	0.388772	TRUE	3	26	1	78.4246				N	N	N	N	N
F4	6BA-5d	Max1	UNKNOWN	SYBR	None				34.25	34.2291	0.671842		3.85497	0.405296				TRUE	0.0244637	TRUE	3	33	1	81.6536				Y	N	N	N	N
F5	6BA-5d	Max1	UNKNOWN	SYBR	None				34.8903	34.2291	0.671842		3.85497	0.405296				TRUE	0.0244637	TRUE	3	32	1	81.8436				Y	N	N	N	N
F6	6BA-5d	Max1	UNKNOWN	SYBR	None				33.5471	34.2291	0.671842		3.85497	0.405296				TRUE	0.0244637	TRUE	3	32	1	81.6536				Y	N	N	N	N
F7	GR24-3d	Max1	UNKNOWN	SYBR	None				Undetermined	33.0169	1.4612		5.86012	1.09046				TRUE	0.0244637	TRUE	3	39	1	61.8994	90.3911	83.1732		N	Y	N	Y	Y
F8	GR24-3d	Max1	UNKNOWN	SYBR	None				31.9837	33.0169	1.4612		5.86012	1.09046				TRUE	0.0244637	TRUE	3	30	1	81.4637				Y	N	N	N	N
F9	GR24-3d	Max1	UNKNOWN	SYBR	None				34.0501	33.0169	1.4612		5.86012	1.09046				TRUE	0.0244637	TRUE	3	32	1	81.6536				Y	N	N	N	N
F10	GR24-3d	tubclin	UNKNOWN	SYBR	None				26.9886	27.1568	0.603875							TRUE	0.388772	TRUE	3	21	1	78.2346				Y	N	N	N	N
F11	GR24-3d	tubclin	UNKNOWN	SYBR	None				27.8269	27.1568	0.603875							TRUE	0.388772	TRUE	3	24	1	78.0447				Y	N	N	N	N
F12	GR24-3d	tubclin	UNKNOWN	SYBR	None				26.6548	27.1568	0.603875							TRUE	0.388772	TRUE	3	20	1	77.8547				Y	N	N	N	N
G1	IAA-1d	tubclin	UNKNOWN	SYBR	None				27.4818	26.9456	0.474173							TRUE	0.388772	TRUE	3	24	1	77.8547				N	N	N	N	N
G2	IAA-1d	tubclin	UNKNOWN	SYBR	None				26.7738	26.9456	0.474173							TRUE	0.388772	TRUE	3	23	1	78.0447				N	N	N	N	N
G3	IAA-1d	tubclin	UNKNOWN	SYBR	None				26.5813	26.9456	0.474173							TRUE	0.388772	TRUE	3	22	1	78.2346				N	N	N	N	N
G4	IAA-1d	Max1	UNKNOWN	SYBR	None				35.2289	35.1655	0.252494		8.21986	0.310158				TRUE	0.0244637	TRUE	3	33	1	81.2737				N	N	N	N	N
G5	IAA-1d	Max1	UNKNOWN	SYBR	None				34.8873	35.1655	0.252494		8.21986	0.310158				TRUE	0.0244637	TRUE	3	32	1	81.4637				N	N	N	N	N
G6	IAA-1d	Max1	UNKNOWN	SYBR	None				35.3802	35.1655	0.252494		8.21986	0.310158				TRUE	0.0244637	TRUE	3	33	1	80.8939				N	N	N	N	N
G7	GR24-5d	Max1	UNKNOWN	SYBR	None				32.2942	33.2562	1.36047		6.36264	0.963665				TRUE	0.0244637	TRUE	3	30	1	81.4637				Y	N	N	N	N
G8	GR24-5d	Max1	UNKNOWN	SYBR	None				34.2182	33.2562	1.36047		6.36264	0.963665				TRUE	0.0244637	TRUE	3	32	1	81.6536				Y	N	N	N	N
G9	GR24-5d	Max1	UNKNOWN	SYBR	None				Undetermined	33.2562	1.36047		6.36264	0.963665				TRUE	0.0244637	TRUE	3	39	1	61.8994				N	Y	N	Y	N
G10	GR24-5d	tubclin	UNKNOWN	SYBR	None				26.8071	26.8936	0.0982527							TRUE	0.388772	TRUE	3	21	1	77.8547				N	N	N	N	N
G11	GR24-5d	tubclin	UNKNOWN	SYBR	None				26.8733	26.8936	0.0982527							TRUE	0.388772	TRUE	3	21	1	78.0447				N	N	N	N	N
G12	GR24-5d	tubclin	UNKNOWN	SYBR	None				27.0004	26.8936	0.0982527							TRUE	0.388772	TRUE	3	21	1	77.8547				N	N	N	N	N
H1	IAA-3d	tubclin	UNKNOWN	SYBR	None				26.9774	26.8362	0.137266							TRUE	0.388772	TRUE	3	23	1	77.8547				N	N	N	N	N
H2	IAA-3d	tubclin	UNKNOWN	SYBR	None				26.7032	26.8362	0.137266							TRUE	0.388772	TRUE	3	22	1	77.8547				N	N	N	N	N
H3	IAA-3d	tubclin	UNKNOWN	SYBR	None				26.828	26.8362	0.137266							TRUE	0.388772	TRUE	3	22	1	78.0447				N	N	N	N	N
H4	IAA-3d	Max1	UNKNOWN	SYBR	None				Undetermined	34.8824	1.87006		8.04623	1.3247				TRUE	0.0244637	TRUE	3	39	1	61.5196				N	Y	N	Y	N
H5	IAA-3d	Max1	UNKNOWN	SYBR	None				36.2047	34.8824	1.87006		8.04623	1.3247				TRUE	0.0244637	TRUE	3	34	1	81.4637				Y	N	N	N	N
H6	IAA-3d	Max1	UNKNOWN	SYBR	None				33.5601	34.8824	1.87006		8.04623	1.3247				TRUE	0.0244637	TRUE	3	32	1	81.4637				Y	N	N	N	N
H7	CK	Max1	UNKNOWN	SYBR	None				30.7768	30.3996	0.697772		4.42864	0.603032				TRUE	0.0244637	TRUE	3	28	1	81.0838				Y	N	N	N	N
H8	CK	Max1	UNKNOWN	SYBR	None				29.5944	30.3996	0.697772		4.42864	0.603032				TRUE	0.0244637	TRUE	3	30	1	81.2737				Y	N	Y	N	N
H9	CK	Max1	UNKNOWN	SYBR	None				30.8276	30.3996	0.697772		4.42864	0.603032				TRUE	0.0244637	TRUE	3	29	1	81.0838				Y	N	N	N	N
H10	CK	tubclin	UNKNOWN	SYBR	None				26.8317	26.9709	0.140046							TRUE	0.388772	TRUE	3	21	1	77.6648				N	N	N	N	N
H11	CK	tubclin	UNKNOWN	SYBR	None				26.9692	26.9709	0.140046							TRUE	0.388772	TRUE	3	21	1	77.6648				N	N	N	N	N
H12	CK	tubclin	UNKNOWN	SYBR	None				27.1118	26.9709	0.140046							TRUE	0.388772	TRUE	3	21	1	77.4749				N	N	N	N	N
Analysis Type	Singleplex
Endogenous Control	tubclin
RQ Min/Max Confidence Level	95.0
Reference Sample	ABA-1d

## Sheet: Max2-hormone
Block Type	96alum
Chemistry	SYBR_GREEN
Experiment File Name	D:\20220331-2.eds
Experiment Run End Time	2022-03-31 16:18:59
Instrument Type	sds7500
Passive Reference	ROX
Well	Sample Name	Target Name	Task	Reporter	Quencher	RQ	RQ Min	RQ Max	Cт	Cт Mean	Cт SD	ΔCт	ΔCт Mean	ΔCт SE	HK Control ΔCт Mean	HK Control ΔCт SE	ΔΔCт	Automatic Ct Threshold	Ct Threshold	Automatic Baseline	Baseline Start	Baseline End	Efficiency	Tm1	Tm2	Tm3	Comments	HIGHSD	OUTLIERRG
A1	ABA-1d	tubclin	UNKNOWN	SYBR	None				30.8197	30.0821	0.734209							TRUE	0.216779	TRUE	3	29	1	77.5782				Y	N
A2	ABA-1d	tubclin	UNKNOWN	SYBR	None				30.0754	30.0821	0.734209							TRUE	0.216779	TRUE	3	28	1	77.7637				Y	N
A3	ABA-1d	tubclin	UNKNOWN	SYBR	None				29.3513	30.0821	0.734209							TRUE	0.216779	TRUE	3	26	1	77.9492				Y	N
A4	ABA-1d	Max2	UNKNOWN	SYBR	None	1	0.313838	3.18636	34.9204	35.0138	0.740801		4.93163	0.602177			0	TRUE	0.535412	TRUE	3	31	1	81.8441				Y	N
A5	ABA-1d	Max2	UNKNOWN	SYBR	None	1	0.313838	3.18636	34.3241	35.0138	0.740801		4.93163	0.602177			0	TRUE	0.535412	TRUE	3	28	1	82.4006				Y	N
A6	ABA-1d	Max2	UNKNOWN	SYBR	None	1	0.313838	3.18636	35.7968	35.0138	0.740801		4.93163	0.602177			0	TRUE	0.535412	TRUE	3	30	1	82.4006				Y	N
A7	IAA-5d	Max2	UNKNOWN	SYBR	None	1.7283	0.919391	3.2489	31.1117	31.7122	0.538153		4.14228	0.327973			-0.789351	TRUE	0.535412	TRUE	3	25	1	82.586				Y	N
A8	IAA-5d	Max2	UNKNOWN	SYBR	None	1.7283	0.919391	3.2489	31.8741	31.7122	0.538153		4.14228	0.327973			-0.789351	TRUE	0.535412	TRUE	3	25	1	82.4006				Y	N
A9	IAA-5d	Max2	UNKNOWN	SYBR	None	1.7283	0.919391	3.2489	32.1508	31.7122	0.538153		4.14228	0.327973			-0.789351	TRUE	0.535412	TRUE	3	26	1	82.4006				Y	N
A10	IAA-5d	tubclin	UNKNOWN	SYBR	None				27.3961	27.5699	0.181909							TRUE	0.216779	TRUE	3	23	1	77.7637				N	N
A11	IAA-5d	tubclin	UNKNOWN	SYBR	None				27.7589	27.5699	0.181909							TRUE	0.216779	TRUE	3	24	1	77.5782				N	N
A12	IAA-5d	tubclin	UNKNOWN	SYBR	None				27.5548	27.5699	0.181909							TRUE	0.216779	TRUE	3	24	1	77.5782				N	N
B1	ABA-3d	tubclin	UNKNOWN	SYBR	None				28.155	27.4287	0.650628							TRUE	0.216779	TRUE	3	26	1	77.9492				Y	N
B2	ABA-3d	tubclin	UNKNOWN	SYBR	None				27.2317	27.4287	0.650628							TRUE	0.216779	TRUE	3	24	1	77.7637				Y	N
B3	ABA-3d	tubclin	UNKNOWN	SYBR	None				26.8993	27.4287	0.650628							TRUE	0.216779	TRUE	3	23	1	78.1346				Y	N
B4	ABA-3d	Max2	UNKNOWN	SYBR	None	1.01944	0.381793	2.72207	32.7439	32.3325	0.598341		4.90385	0.510336			-0.0277831	TRUE	0.535412	TRUE	3	27	1	82.586				Y	N
B5	ABA-3d	Max2	UNKNOWN	SYBR	None	1.01944	0.381793	2.72207	32.6076	32.3325	0.598341		4.90385	0.510336			-0.0277831	TRUE	0.535412	TRUE	3	25	1	82.586				Y	N
B6	ABA-3d	Max2	UNKNOWN	SYBR	None	1.01944	0.381793	2.72207	31.6461	32.3325	0.598341		4.90385	0.510336			-0.0277831	TRUE	0.535412	TRUE	3	25	1	82.4006				Y	N
B7	Suc-1d	Max2	UNKNOWN	SYBR	None	0.699688	0.52504	0.932431	32.3027	32.09	0.193831		5.44685	0.149214			0.515216	TRUE	0.535412	TRUE	3	25	1	82.7715				N	N
B8	Suc-1d	Max2	UNKNOWN	SYBR	None	0.699688	0.52504	0.932431	32.0439	32.09	0.193831		5.44685	0.149214			0.515216	TRUE	0.535412	TRUE	3	25	1	82.586				N	N
B9	Suc-1d	Max2	UNKNOWN	SYBR	None	0.699688	0.52504	0.932431	31.9234	32.09	0.193831		5.44685	0.149214			0.515216	TRUE	0.535412	TRUE	3	25	1	82.4006				N	N
B10	Suc-1d	tubclin	UNKNOWN	SYBR	None				26.5859	26.6431	0.17095							TRUE	0.216779	TRUE	3	22	1	77.9492				N	N
B11	Suc-1d	tubclin	UNKNOWN	SYBR	None				26.8354	26.6431	0.17095							TRUE	0.216779	TRUE	3	22	1	77.9492				N	N
B12	Suc-1d	tubclin	UNKNOWN	SYBR	None				26.5081	26.6431	0.17095							TRUE	0.216779	TRUE	3	21	1	77.5782				N	N
C1	ABA-5d	tubclin	UNKNOWN	SYBR	None				28.3334	27.8695	0.403182							TRUE	0.216779	TRUE	3	26	1	78.1346				N	N
C2	ABA-5d	tubclin	UNKNOWN	SYBR	None				27.6038	27.8695	0.403182							TRUE	0.216779	TRUE	3	24	1	78.3201				N	N
C3	ABA-5d	tubclin	UNKNOWN	SYBR	None				27.6712	27.8695	0.403182							TRUE	0.216779	TRUE	3	24	1	78.3201				N	N
C4	ABA-5d	Max2	UNKNOWN	SYBR	None	2.63836	1.13364	6.14034	32.1457	31.4015	0.644542		3.53199	0.438934			-1.39964	TRUE	0.535412	TRUE	3	26	1	82.7715				Y	Y
C5	ABA-5d	Max2	UNKNOWN	SYBR	None	2.63836	1.13364	6.14034	31.0238	31.4015	0.644542		3.53199	0.438934			-1.39964	TRUE	0.535412	TRUE	3	24	1	82.957				Y	N
C6	ABA-5d	Max2	UNKNOWN	SYBR	None	2.63836	1.13364	6.14034	31.0349	31.4015	0.644542		3.53199	0.438934			-1.39964	TRUE	0.535412	TRUE	3	25	1	82.7715				Y	N
C7	Suc-3d	Max2	UNKNOWN	SYBR	None	1.64216	1.24992	2.15747	29.2942	29.4901	0.181392		4.21604	0.141818			-0.715592	TRUE	0.535412	TRUE	3	23	1	82.7715				N	N
C8	Suc-3d	Max2	UNKNOWN	SYBR	None	1.64216	1.24992	2.15747	29.524	29.4901	0.181392		4.21604	0.141818			-0.715592	TRUE	0.535412	TRUE	3	23	1	82.586				N	N
C9	Suc-3d	Max2	UNKNOWN	SYBR	None	1.64216	1.24992	2.15747	29.6522	29.4901	0.181392		4.21604	0.141818			-0.715592	TRUE	0.535412	TRUE	3	23	1	82.2151				N	N
C10	Suc-3d	tubclin	UNKNOWN	SYBR	None				25.0829	25.2741	0.165633							TRUE	0.216779	TRUE	3	20	1	78.1346				N	N
C11	Suc-3d	tubclin	UNKNOWN	SYBR	None				25.3729	25.2741	0.165633							TRUE	0.216779	TRUE	3	20	1	77.9492				N	N
C12	Suc-3d	tubclin	UNKNOWN	SYBR	None				25.3664	25.2741	0.165633							TRUE	0.216779	TRUE	3	19	1	77.7637				N	N
D1	6BA-1d	tubclin	UNKNOWN	SYBR	None				26.638	26.5458	0.464433							TRUE	0.216779	TRUE	3	23	1	78.3201				N	N
D2	6BA-1d	tubclin	UNKNOWN	SYBR	None				26.9571	26.5458	0.464433							TRUE	0.216779	TRUE	3	24	1	78.3201				N	N
D3	6BA-1d	tubclin	UNKNOWN	SYBR	None				26.0421	26.5458	0.464433							TRUE	0.216779	TRUE	3	21	1	78.5056				N	N
D4	6BA-1d	Max2	UNKNOWN	SYBR	None	1.0183	0.586728	1.76732	31.2768	31.4512	0.174692		4.90547	0.286482			-0.0261637	TRUE	0.535412	TRUE	3	25	1	82.957				N	N
D5	6BA-1d	Max2	UNKNOWN	SYBR	None	1.0183	0.586728	1.76732	31.4507	31.4512	0.174692		4.90547	0.286482			-0.0261637	TRUE	0.535412	TRUE	3	25	1	82.957				N	N
D6	6BA-1d	Max2	UNKNOWN	SYBR	None	1.0183	0.586728	1.76732	31.6262	31.4512	0.174692		4.90547	0.286482			-0.0261637	TRUE	0.535412	TRUE	3	25	1	82.7715				N	N
D7	Suc-5d	Max2	UNKNOWN	SYBR	None	0.976154	0.760863	1.25236	30.5622	30.7567	0.219919		4.96645	0.129472			0.0348199	TRUE	0.535412	TRUE	3	24	1	82.957				N	N
D8	Suc-5d	Max2	UNKNOWN	SYBR	None	0.976154	0.760863	1.25236	30.9953	30.7567	0.219919		4.96645	0.129472			0.0348199	TRUE	0.535412	TRUE	3	24	1	82.957				N	N
D9	Suc-5d	Max2	UNKNOWN	SYBR	None	0.976154	0.760863	1.25236	30.7126	30.7567	0.219919		4.96645	0.129472			0.0348199	TRUE	0.535412	TRUE	3	24	1	82.7715				N	N
D10	Suc-5d	tubclin	UNKNOWN	SYBR	None				25.7963	25.7903	0.043874							TRUE	0.216779	TRUE	3	20	1	78.3201				N	N
D11	Suc-5d	tubclin	UNKNOWN	SYBR	None				25.7437	25.7903	0.043874							TRUE	0.216779	TRUE	3	19	1	78.1346				N	N
D12	Suc-5d	tubclin	UNKNOWN	SYBR	None				25.8308	25.7903	0.043874							TRUE	0.216779	TRUE	3	21	1	77.7637				N	N
E1	6BA-3d	tubclin	UNKNOWN	SYBR	None				25.0342	24.8361	0.283483							TRUE	0.216779	TRUE	3	22	1	78.3201				N	N
E2	6BA-3d	tubclin	UNKNOWN	SYBR	None				24.5114	24.8361	0.283483							TRUE	0.216779	TRUE	3	21	1	78.3201				N	N
E3	6BA-3d	tubclin	UNKNOWN	SYBR	None				24.9628	24.8361	0.283483							TRUE	0.216779	TRUE	3	22	1	78.5056				N	N
E4	6BA-3d	Max2	UNKNOWN	SYBR	None	0.712767	0.475735	1.0679	30.0035	30.2563	0.228116		5.42013	0.210079			0.488498	TRUE	0.535412	TRUE	3	23	1	82.957				N	N
E5	6BA-3d	Max2	UNKNOWN	SYBR	None	0.712767	0.475735	1.0679	30.3185	30.2563	0.228116		5.42013	0.210079			0.488498	TRUE	0.535412	TRUE	3	23	1	82.957				N	N
E6	6BA-3d	Max2	UNKNOWN	SYBR	None	0.712767	0.475735	1.0679	30.4468	30.2563	0.228116		5.42013	0.210079			0.488498	TRUE	0.535412	TRUE	3	24	1	82.957				N	N
E7	GR24-1d	Max2	UNKNOWN	SYBR	None	0.378061	0.145034	0.985496	33.3824	34.289	0.816204		6.33494	0.497842			1.40331	TRUE	0.535412	TRUE	3	27	1	82.957				Y	N
E8	GR24-1d	Max2	UNKNOWN	SYBR	None	0.378061	0.145034	0.985496	34.5193	34.289	0.816204		6.33494	0.497842			1.40331	TRUE	0.535412	TRUE	3	28	1	82.7715				Y	N
E9	GR24-1d	Max2	UNKNOWN	SYBR	None	0.378061	0.145034	0.985496	34.9653	34.289	0.816204		6.33494	0.497842			1.40331	TRUE	0.535412	TRUE	3	28	1	83.1425				Y	N
E10	GR24-1d	tubclin	UNKNOWN	SYBR	None				27.7433	27.954	0.278121							TRUE	0.216779	TRUE	3	22	1	78.3201				N	N
E11	GR24-1d	tubclin	UNKNOWN	SYBR	None				28.2693	27.954	0.278121							TRUE	0.216779	TRUE	3	23	1	78.1346				N	N
E12	GR24-1d	tubclin	UNKNOWN	SYBR	None				27.8495	27.954	0.278121							TRUE	0.216779	TRUE	3	23	1	77.7637				N	N
F1	6BA-5d	tubclin	UNKNOWN	SYBR	None				29.9386	29.6636	0.238489							TRUE	0.216779	TRUE	3	27	1	78.1346				N	N
F2	6BA-5d	tubclin	UNKNOWN	SYBR	None				29.5385	29.6636	0.238489							TRUE	0.216779	TRUE	3	26	1	78.3201				N	N
F3	6BA-5d	tubclin	UNKNOWN	SYBR	None				29.5137	29.6636	0.238489							TRUE	0.216779	TRUE	3	26	1	78.3201				N	N
F4	6BA-5d	Max2	UNKNOWN	SYBR	None	0.624483	0.3322	1.17393	35.8695	35.2745	0.515588		5.6109	0.327978			0.679267	TRUE	0.535412	TRUE	3	29	1	82.957				Y	N
F5	6BA-5d	Max2	UNKNOWN	SYBR	None	0.624483	0.3322	1.17393	34.9927	35.2745	0.515588		5.6109	0.327978			0.679267	TRUE	0.535412	TRUE	3	28	1	83.1425				Y	N
F6	6BA-5d	Max2	UNKNOWN	SYBR	None	0.624483	0.3322	1.17393	34.9612	35.2745	0.515588		5.6109	0.327978			0.679267	TRUE	0.535412	TRUE	3	28	1	82.957				Y	N
F7	GR24-3d	Max2	UNKNOWN	SYBR	None	0.397712	0.209663	0.754426	32.2257	32.3696	0.284449		6.26183	0.332675			1.3302	TRUE	0.535412	TRUE	3	25	1	82.957				N	N
F8	GR24-3d	Max2	UNKNOWN	SYBR	None	0.397712	0.209663	0.754426	32.1859	32.3696	0.284449		6.26183	0.332675			1.3302	TRUE	0.535412	TRUE	3	26	1	82.957				N	N
F9	GR24-3d	Max2	UNKNOWN	SYBR	None	0.397712	0.209663	0.754426	32.6973	32.3696	0.284449		6.26183	0.332675			1.3302	TRUE	0.535412	TRUE	3	26	1	82.7715				N	N
F10	GR24-3d	tubclin	UNKNOWN	SYBR	None				25.5331	26.1078	0.501106							TRUE	0.216779	TRUE	3	20	1	78.1346				Y	N
F11	GR24-3d	tubclin	UNKNOWN	SYBR	None				26.4533	26.1078	0.501106							TRUE	0.216779	TRUE	3	23	1	77.9492				Y	N
F12	GR24-3d	tubclin	UNKNOWN	SYBR	None				26.337	26.1078	0.501106							TRUE	0.216779	TRUE	3	21	1	77.5782				Y	N
G1	IAA-1d	tubclin	UNKNOWN	SYBR	None				27.1075	26.487	0.546738							TRUE	0.216779	TRUE	3	25	1	77.9492				Y	N
G2	IAA-1d	tubclin	UNKNOWN	SYBR	None				26.2777	26.487	0.546738							TRUE	0.216779	TRUE	3	23	1	78.1346				Y	N
G3	IAA-1d	tubclin	UNKNOWN	SYBR	None				26.0758	26.487	0.546738							TRUE	0.216779	TRUE	3	20	1	78.3201				Y	N
G4	IAA-1d	Max2	UNKNOWN	SYBR	None	1.24346	0.618716	2.49904	31.2669	31.1043	0.309397		4.61727	0.362698			-0.31436	TRUE	0.535412	TRUE	3	25	1	82.586				N	N
G5	IAA-1d	Max2	UNKNOWN	SYBR	None	1.24346	0.618716	2.49904	31.2985	31.1043	0.309397		4.61727	0.362698			-0.31436	TRUE	0.535412	TRUE	3	25	1	82.586				N	N
G6	IAA-1d	Max2	UNKNOWN	SYBR	None	1.24346	0.618716	2.49904	30.7475	31.1043	0.309397		4.61727	0.362698			-0.31436	TRUE	0.535412	TRUE	3	24	1	82.7715				N	N
G7	GR24-5d	Max2	UNKNOWN	SYBR	None	1.5279	1.25809	1.85558	30.2952	30.2637	0.17106		4.32008	0.100962			-0.611554	TRUE	0.535412	TRUE	3	24	1	82.7715				N	N
G8	GR24-5d	Max2	UNKNOWN	SYBR	None	1.5279	1.25809	1.85558	30.4168	30.2637	0.17106		4.32008	0.100962			-0.611554	TRUE	0.535412	TRUE	3	24	1	82.7715				N	N
G9	GR24-5d	Max2	UNKNOWN	SYBR	None	1.5279	1.25809	1.85558	30.079	30.2637	0.17106		4.32008	0.100962			-0.611554	TRUE	0.535412	TRUE	3	24	1	82.586				N	N
G10	GR24-5d	tubclin	UNKNOWN	SYBR	None				25.9017	25.9436	0.0363124							TRUE	0.216779	TRUE	3	21	1	78.1346				N	N
G11	GR24-5d	tubclin	UNKNOWN	SYBR	None				25.9642	25.9436	0.0363124							TRUE	0.216779	TRUE	3	20	1	77.9492				N	N
G12	GR24-5d	tubclin	UNKNOWN	SYBR	None				25.9649	25.9436	0.0363124							TRUE	0.216779	TRUE	3	21	1	77.7637				N	N
H1	IAA-3d	tubclin	UNKNOWN	SYBR	None				27.4891	27.0772	0.41542							TRUE	0.216779	TRUE	3	25	1	77.7637				N	N
H2	IAA-3d	tubclin	UNKNOWN	SYBR	None				27.0842	27.0772	0.41542							TRUE	0.216779	TRUE	3	24	1	77.9492				N	N
H3	IAA-3d	tubclin	UNKNOWN	SYBR	None				26.6583	27.0772	0.41542							TRUE	0.216779	TRUE	3	23	1	77.9492				N	N
H4	IAA-3d	Max2	UNKNOWN	SYBR	None	0.721222	0.445797	1.16681	32.3643	32.4803	0.122053		5.40312	0.24998			0.471485	TRUE	0.535412	TRUE	3	26	1	81.6587				N	N
H5	IAA-3d	Max2	UNKNOWN	SYBR	None	0.721222	0.445797	1.16681	32.4689	32.4803	0.122053		5.40312	0.24998			0.471485	TRUE	0.535412	TRUE	3	25	1	82.4006				N	N
H6	IAA-3d	Max2	UNKNOWN	SYBR	None	0.721222	0.445797	1.16681	32.6076	32.4803	0.122053		5.40312	0.24998			0.471485	TRUE	0.535412	TRUE	3	26	1	82.586				N	N
H7	CK	Max2	UNKNOWN	SYBR	None	0.739306	0.526578	1.03797	32.215	31.9715	0.244472		5.36739	0.176313			0.435757	TRUE	0.535412	TRUE	3	26	1	82.586				N	N
H8	CK	Max2	UNKNOWN	SYBR	None	0.739306	0.526578	1.03797	31.9733	31.9715	0.244472		5.36739	0.176313			0.435757	TRUE	0.535412	TRUE	3	26	1	82.4006				N	N
H9	CK	Max2	UNKNOWN	SYBR	None	0.739306	0.526578	1.03797	31.7261	31.9715	0.244472		5.36739	0.176313			0.435757	TRUE	0.535412	TRUE	3	25	1	82.4006				N	N
H10	CK	tubclin	UNKNOWN	SYBR	None				26.4354	26.6041	0.183009							TRUE	0.216779	TRUE	3	21	1	77.9492				N	N
H11	CK	tubclin	UNKNOWN	SYBR	None				26.7987	26.6041	0.183009							TRUE	0.216779	TRUE	3	22	1	77.5782				N	N
H12	CK	tubclin	UNKNOWN	SYBR	None				26.5783	26.6041	0.183009							TRUE	0.216779	TRUE	3	22	1	77.5782				N	N
Analysis Type	Singleplex
Endogenous Control	tubclin
RQ Min/Max Confidence Level	95.0
Reference Sample	ABA-1d

## Sheet: MAX3-hormone
Block Type	96alum
Chemistry	SYBR_GREEN
Experiment File Name	D:\20220413-1.eds
Experiment Run End Time	2022-04-13 14:19:25
Instrument Type	sds7500
Passive Reference	ROX
Well	Sample Name	Target Name	Task	Reporter	Quencher	RQ	RQ Min	RQ Max	Cт	Cт Mean	Cт SD	ΔCт	ΔCт Mean	ΔCт SE	HK Control ΔCт Mean	HK Control ΔCт SE	ΔΔCт	Automatic Ct Threshold	Ct Threshold	Automatic Baseline	Baseline Start	Baseline End	Efficiency	Tm1	Tm2	Tm3	Comments	HIGHSD	NOAMP	EXPFAIL	MTP
A1	ABA-1d	tubclin	UNKNOWN	SYBR	None				36.4165	37.2165	0.753601							TRUE	0.0407171	TRUE	3	39	1	67.8062	73.3277			N	Y	Y	Y
A2	ABA-1d	tubclin	UNKNOWN	SYBR	None				37.32	37.2165	0.753601							TRUE	0.0407171	TRUE	3	35	1	77.5164				N	N	N	N
A3	ABA-1d	tubclin	UNKNOWN	SYBR	None				37.913	37.2165	0.753601							TRUE	0.0407171	TRUE	3	35	1	77.5164				N	N	N	N
A4	ABA-1d	Max3	UNKNOWN	SYBR	None				34.7574	35.1574	0.454073							TRUE	0.0187361	TRUE	3	39	1	72.9469				N	Y	Y	N
A5	ABA-1d	Max3	UNKNOWN	SYBR	None				35.0638	35.1574	0.454073							TRUE	0.0187361	TRUE	3	34	1	73.3277				Y	N	N	N
A6	ABA-1d	Max3	UNKNOWN	SYBR	None				35.651	35.1574	0.454073							TRUE	0.0187361	TRUE	3	33	1	73.5181				Y	N	N	N
A7	IAA-5d	Max3	UNKNOWN	SYBR	None				33.5259	33.9376	0.35827							TRUE	0.0187361	TRUE	3	32	1	78.6588				Y	N	N	N
A8	IAA-5d	Max3	UNKNOWN	SYBR	None				34.108	33.9376	0.35827							TRUE	0.0187361	TRUE	3	27	1	79.9915				Y	N	N	N
A9	IAA-5d	Max3	UNKNOWN	SYBR	None				34.1789	33.9376	0.35827							TRUE	0.0187361	TRUE	3	33	1	73.3277				Y	N	N	N
A10	IAA-5d	tubclin	UNKNOWN	SYBR	None				33.5823	34.4981	0.89207							TRUE	0.0407171	TRUE	3	31	1	77.8972				Y	N	N	N
A11	IAA-5d	tubclin	UNKNOWN	SYBR	None				34.5476	34.4981	0.89207							TRUE	0.0407171	TRUE	3	32	1	77.7068				Y	N	N	N
A12	IAA-5d	tubclin	UNKNOWN	SYBR	None				35.3644	34.4981	0.89207							TRUE	0.0407171	TRUE	3	34	1	77.7068				Y	N	N	N
B1	ABA-3d	tubclin	UNKNOWN	SYBR	None				36.7567	36.1111	0.580372							TRUE	0.0407171	TRUE	3	35	1	77.5164				Y	N	N	N
B2	ABA-3d	tubclin	UNKNOWN	SYBR	None				35.9442	36.1111	0.580372							TRUE	0.0407171	TRUE	3	35	1	77.7068				Y	N	N	N
B3	ABA-3d	tubclin	UNKNOWN	SYBR	None				35.6325	36.1111	0.580372							TRUE	0.0407171	TRUE	3	31	1	77.8972				Y	N	N	N
B4	ABA-3d	Max3	UNKNOWN	SYBR	None				36.7792	35.5546	1.10096							TRUE	0.0187361	TRUE	3	35	1	73.8989				Y	N	N	N
B5	ABA-3d	Max3	UNKNOWN	SYBR	None				35.238	35.5546	1.10096							TRUE	0.0187361	TRUE	3	33	1	74.8508				Y	N	N	N
B6	ABA-3d	Max3	UNKNOWN	SYBR	None				34.6467	35.5546	1.10096							TRUE	0.0187361	TRUE	3	28	1	80.3723				Y	N	N	N
B7	Suc-1d	Max3	UNKNOWN	SYBR	None				30.1834	30.8376	0.618954							TRUE	0.0187361	TRUE	3	29	1	80.3723				N	N	N	N
B8	Suc-1d	Max3	UNKNOWN	SYBR	None				30.9154	30.8376	0.618954							TRUE	0.0187361	TRUE	3	39	1	62.0943				N	Y	Y	N
B9	Suc-1d	Max3	UNKNOWN	SYBR	None				31.4139	30.8376	0.618954							TRUE	0.0187361	TRUE	3	39	1	62.0943				N	Y	Y	N
B10	Suc-1d	tubclin	UNKNOWN	SYBR	None				33.1405	33.081	0.0704259							TRUE	0.0407171	TRUE	3	33	1	76.7548	66.2831			Y	N	N	Y
B11	Suc-1d	tubclin	UNKNOWN	SYBR	None				33.0992	33.081	0.0704259							TRUE	0.0407171	TRUE	3	31	1	77.5164				Y	N	N	N
B12	Suc-1d	tubclin	UNKNOWN	SYBR	None				33.0032	33.081	0.0704259							TRUE	0.0407171	TRUE	3	31	1	77.7068				Y	N	N	N
C1	ABA-5d	tubclin	UNKNOWN	SYBR	None				36.9134	35.383	1.45612							TRUE	0.0407171	TRUE	3	35	1	77.7068				Y	N	N	N
C2	ABA-5d	tubclin	UNKNOWN	SYBR	None				35.2209	35.383	1.45612							TRUE	0.0407171	TRUE	3	34	1	78.0876				Y	N	N	N
C3	ABA-5d	tubclin	UNKNOWN	SYBR	None				34.0147	35.383	1.45612							TRUE	0.0407171	TRUE	3	32	1	78.0876				Y	N	N	N
C4	ABA-5d	Max3	UNKNOWN	SYBR	None				38.9154	38.2413	0.714392							TRUE	0.0187361	TRUE	3	39	1	61.7136				N	Y	Y	N
C5	ABA-5d	Max3	UNKNOWN	SYBR	None				37.4925	38.2413	0.714392							TRUE	0.0187361	TRUE	3	39	1	61.904				N	Y	Y	N
C6	ABA-5d	Max3	UNKNOWN	SYBR	None				38.316	38.2413	0.714392							TRUE	0.0187361	TRUE	3	39	1	61.904				N	Y	Y	N
C7	Suc-3d	Max3	UNKNOWN	SYBR	None				30.9154	30.6489	0.414891							TRUE	0.0187361	TRUE	3	29	1	80.3723				N	N	N	N
C8	Suc-3d	Max3	UNKNOWN	SYBR	None				30.8604	30.6489	0.414891							TRUE	0.0187361	TRUE	3	39	1	61.904				N	Y	Y	N
C9	Suc-3d	Max3	UNKNOWN	SYBR	None				30.1709	30.6489	0.414891							TRUE	0.0187361	TRUE	3	39	1	61.904				N	Y	Y	N
C10	Suc-3d	tubclin	UNKNOWN	SYBR	None				30.0952	29.7335	0.315973							TRUE	0.0407171	TRUE	3	27	1	78.278				N	N	N	N
C11	Suc-3d	tubclin	UNKNOWN	SYBR	None				29.5111	29.7335	0.315973							TRUE	0.0407171	TRUE	3	27	1	78.0876				N	N	N	N
C12	Suc-3d	tubclin	UNKNOWN	SYBR	None				29.5942	29.7335	0.315973							TRUE	0.0407171	TRUE	3	27	1	77.8972				N	N	N	N
D1	6BA-1d	tubclin	UNKNOWN	SYBR	None				34.9629	35.9063	0.918936							TRUE	0.0407171	TRUE	3	33	1	78.0876				Y	N	N	N
D2	6BA-1d	tubclin	UNKNOWN	SYBR	None				36.7986	35.9063	0.918936							TRUE	0.0407171	TRUE	3	35	1	77.8972				Y	N	N	N
D3	6BA-1d	tubclin	UNKNOWN	SYBR	None				35.9575	35.9063	0.918936							TRUE	0.0407171	TRUE	3	34	1	78.6588				Y	N	N	N
D4	6BA-1d	Max3	UNKNOWN	SYBR	None				31.4487	30.4487	1.02261							TRUE	0.0187361	TRUE	3	39	1	62.0943				N	Y	Y	N
D5	6BA-1d	Max3	UNKNOWN	SYBR	None				30.4925	30.4487	1.02261							TRUE	0.0187361	TRUE	3	30	1	80.3723				Y	N	N	N
D6	6BA-1d	Max3	UNKNOWN	SYBR	None				29.4049	30.4487	1.02261							TRUE	0.0187361	TRUE	3	28	1	80.5627				Y	N	N	N
D7	Suc-5d	Max3	UNKNOWN	SYBR	None				32.5062	32.7062	0.222487							TRUE	0.0187361	TRUE	3	39	1	62.0943				N	Y	Y	N
D8	Suc-5d	Max3	UNKNOWN	SYBR	None				32.9459	32.7062	0.222487							TRUE	0.0187361	TRUE	3	33	1	81.1339				Y	N	N	N
D9	Suc-5d	Max3	UNKNOWN	SYBR	None				32.6666	32.7062	0.222487							TRUE	0.0187361	TRUE	3	29	1	80.3723				Y	N	N	N
D10	Suc-5d	tubclin	UNKNOWN	SYBR	None				30.0558	29.894	0.203753							TRUE	0.0407171	TRUE	3	27	1	78.278				N	N	N	N
D11	Suc-5d	tubclin	UNKNOWN	SYBR	None				29.961	29.894	0.203753							TRUE	0.0407171	TRUE	3	27	1	78.0876				N	N	N	N
D12	Suc-5d	tubclin	UNKNOWN	SYBR	None				29.6652	29.894	0.203753							TRUE	0.0407171	TRUE	3	28	1	77.8972				N	N	N	N
E1	6BA-3d	tubclin	UNKNOWN	SYBR	None				35.5611	35.0109	0.503181							TRUE	0.0407171	TRUE	3	34	1	78.278				Y	N	N	N
E2	6BA-3d	tubclin	UNKNOWN	SYBR	None				34.5741	35.0109	0.503181							TRUE	0.0407171	TRUE	3	33	1	78.4684				Y	N	N	N
E3	6BA-3d	tubclin	UNKNOWN	SYBR	None				34.8974	35.0109	0.503181							TRUE	0.0407171	TRUE	3	33	1	78.4684				Y	N	N	N
E4	6BA-3d	Max3	UNKNOWN	SYBR	None				30.818	30.5548	0.249074							TRUE	0.0187361	TRUE	3	29	1	80.5627				Y	N	N	N
E5	6BA-3d	Max3	UNKNOWN	SYBR	None				30.5234	30.5548	0.249074							TRUE	0.0187361	TRUE	3	35	1	80.9435	61.904			Y	N	N	Y
E6	6BA-3d	Max3	UNKNOWN	SYBR	None				30.3229	30.5548	0.249074							TRUE	0.0187361	TRUE	3	29	1	80.5627				Y	N	N	N
E7	GR24-1d	Max3	UNKNOWN	SYBR	None				38.9861	38.2813	0.780523							TRUE	0.0187361	TRUE	3	39	1	61.904	80.7531			N	Y	Y	Y
E8	GR24-1d	Max3	UNKNOWN	SYBR	None				38.4154	38.2813	0.780523							TRUE	0.0187361	TRUE	3	39	1	61.904				N	Y	Y	N
E9	GR24-1d	Max3	UNKNOWN	SYBR	None				37.4424	38.2813	0.780523							TRUE	0.0187361	TRUE	3	39	1	61.904				N	Y	Y	N
E10	GR24-1d	tubclin	UNKNOWN	SYBR	None				36.6407	36.4889	0.649453							TRUE	0.0407171	TRUE	3	34	1	78.6588				Y	N	N	N
E11	GR24-1d	tubclin	UNKNOWN	SYBR	None				37.049	36.4889	0.649453							TRUE	0.0407171	TRUE	3	34	1	78.278				Y	N	N	N
E12	GR24-1d	tubclin	UNKNOWN	SYBR	None				35.777	36.4889	0.649453							TRUE	0.0407171	TRUE	3	33	1	78.278	66.6638			Y	N	N	Y
F1	6BA-5d	tubclin	UNKNOWN	SYBR	None				Undetermined	39.2843	0.281101							TRUE	0.0407171	TRUE	3	39	1	76.1836				N	Y	Y	N
F2	6BA-5d	tubclin	UNKNOWN	SYBR	None				39.7856	39.2843	0.281101							TRUE	0.0407171	TRUE	3	36	1	78.0876				N	N	N	N
F3	6BA-5d	tubclin	UNKNOWN	SYBR	None				39.4831	39.2843	0.281101							TRUE	0.0407171	TRUE	3	36	1	78.278				N	N	N	N
F4	6BA-5d	Max3	UNKNOWN	SYBR	None				37.214	36.5549	0.613942							TRUE	0.0187361	TRUE	3	35	1	71.2333				Y	N	N	N
F5	6BA-5d	Max3	UNKNOWN	SYBR	None				35.9993	36.5549	0.613942							TRUE	0.0187361	TRUE	3	30	1	80.5627				Y	N	N	N
F6	6BA-5d	Max3	UNKNOWN	SYBR	None				36.4515	36.5549	0.613942							TRUE	0.0187361	TRUE	3	35	1	80.9435				Y	N	N	N
F7	GR24-3d	Max3	UNKNOWN	SYBR	None				30.1267	30.4441	1.17531							TRUE	0.0187361	TRUE	3	25	1	80.3723				Y	N	N	N
F8	GR24-3d	Max3	UNKNOWN	SYBR	None				31.7456	30.4441	1.17531							TRUE	0.0187361	TRUE	3	30	1	80.5627				Y	N	N	N
F9	GR24-3d	Max3	UNKNOWN	SYBR	None				29.4602	30.4441	1.17531							TRUE	0.0187361	TRUE	3	28	1	80.3723				Y	N	N	N
F10	GR24-3d	tubclin	UNKNOWN	SYBR	None				30.5927	30.5548	0.122904							TRUE	0.0407171	TRUE	3	28	1	78.278				Y	N	N	N
F11	GR24-3d	tubclin	UNKNOWN	SYBR	None				30.6544	30.5548	0.122904							TRUE	0.0407171	TRUE	3	31	1	78.0876				Y	N	N	N
F12	GR24-3d	tubclin	UNKNOWN	SYBR	None				30.4174	30.5548	0.122904							TRUE	0.0407171	TRUE	3	28	1	77.8972				Y	N	N	N
G1	IAA-1d	tubclin	UNKNOWN	SYBR	None				35.3248	34.1946	1.10293							TRUE	0.0407171	TRUE	3	34	1	77.8972				Y	N	N	N
G2	IAA-1d	tubclin	UNKNOWN	SYBR	None				34.1378	34.1946	1.10293							TRUE	0.0407171	TRUE	3	32	1	78.0876				Y	N	N	N
G3	IAA-1d	tubclin	UNKNOWN	SYBR	None				33.1211	34.1946	1.10293							TRUE	0.0407171	TRUE	3	31	1	78.278				Y	N	N	N
G4	IAA-1d	Max3	UNKNOWN	SYBR	None				30.4416	30.753	0.715902							TRUE	0.0187361	TRUE	3	29	1	80.3723				N	N	N	N
G5	IAA-1d	Max3	UNKNOWN	SYBR	None				30.2455	30.753	0.715902							TRUE	0.0187361	TRUE	3	39	1	61.904				N	Y	Y	N
G6	IAA-1d	Max3	UNKNOWN	SYBR	None				31.5718	30.753	0.715902							TRUE	0.0187361	TRUE	3	39	1	62.0943				N	Y	Y	N
G7	GR24-5d	Max3	UNKNOWN	SYBR	None	0.969168	0.604251	1.55446	29.4312	29.0654	0.342692		-2.0139	0.245493			0.0451819	TRUE	0.0187361	TRUE	3	28	1	80.3723				N	N	N	N
G8	GR24-5d	Max3	UNKNOWN	SYBR	None	0.969168	0.604251	1.55446	28.7518	29.0654	0.342692		-2.0139	0.245493			0.0451819	TRUE	0.0187361	TRUE	3	27	1	80.1819				N	N	N	N
G9	GR24-5d	Max3	UNKNOWN	SYBR	None	0.969168	0.604251	1.55446	29.0131	29.0654	0.342692		-2.0139	0.245493			0.0451819	TRUE	0.0187361	TRUE	3	27	1	80.1819				N	N	N	N
G10	GR24-5d	tubclin	UNKNOWN	SYBR	None				30.789	31.0793	0.251721							TRUE	0.0407171	TRUE	3	28	1	78.278				N	N	N	N
G11	GR24-5d	tubclin	UNKNOWN	SYBR	None				31.2106	31.0793	0.251721							TRUE	0.0407171	TRUE	3	28	1	78.0876				N	N	N	N
G12	GR24-5d	tubclin	UNKNOWN	SYBR	None				31.2382	31.0793	0.251721							TRUE	0.0407171	TRUE	3	28	1	77.8972				N	N	N	N
H1	IAA-3d	tubclin	UNKNOWN	SYBR	None				32.5059	33.1214	0.770057							TRUE	0.0407171	TRUE	3	34	1	77.7068				Y	N	N	N
H2	IAA-3d	tubclin	UNKNOWN	SYBR	None				33.9849	33.1214	0.770057							TRUE	0.0407171	TRUE	3	32	1	77.8972				Y	N	N	N
H3	IAA-3d	tubclin	UNKNOWN	SYBR	None				32.8734	33.1214	0.770057							TRUE	0.0407171	TRUE	3	31	1	78.0876				Y	N	N	N
H4	IAA-3d	Max3	UNKNOWN	SYBR	None				30.953	30.6955	0.275555							TRUE	0.0187361	TRUE	3	39	1	69.5198				N	N	Y	N
H5	IAA-3d	Max3	UNKNOWN	SYBR	None				30.7285	30.6955	0.275555							TRUE	0.0187361	TRUE	3	39	1	62.0943				N	Y	Y	N
H6	IAA-3d	Max3	UNKNOWN	SYBR	None				30.4049	30.6955	0.275555							TRUE	0.0187361	TRUE	3	29	1	80.1819				N	N	N	N
H7	CK	Max3	UNKNOWN	SYBR	None				30.3528	31.5551	1.1121							TRUE	0.0187361	TRUE	3	29	1	80.1819				Y	N	N	N
H8	CK	Max3	UNKNOWN	SYBR	None				31.7657	31.5551	1.1121							TRUE	0.0187361	TRUE	3	34	1	79.4203				Y	N	N	N
H9	CK	Max3	UNKNOWN	SYBR	None				32.5469	31.5551	1.1121							TRUE	0.0187361	TRUE	3	31	1	79.6107				Y	N	N	N
H10	CK	tubclin	UNKNOWN	SYBR	None				33.7899	34.0951	0.426419							TRUE	0.0407171	TRUE	3	31	1	78.0876				N	N	N	N
H11	CK	tubclin	UNKNOWN	SYBR	None				33.9132	34.0951	0.426419							TRUE	0.0407171	TRUE	3	32	1	77.8972				N	N	N	N
H12	CK	tubclin	UNKNOWN	SYBR	None				34.5823	34.0951	0.426419							TRUE	0.0407171	TRUE	3	32	1	77.326				N	N	N	N
Analysis Type	Singleplex
Endogenous Control	tubclin
RQ Min/Max Confidence Level	95.0
Reference Sample	ABA-1d

## Sheet: Max4-hormone
Block Type	96alum
Chemistry	SYBR_GREEN
Experiment File Name	D:\20220412-2.eds
Experiment Run End Time	2022-04-12 16:25:49
Instrument Type	sds7500
Passive Reference	ROX
Well	Sample Name	Target Name	Task	Reporter	Quencher	RQ	RQ Min	RQ Max	Cт	Cт Mean	Cт SD	ΔCт	ΔCт Mean	ΔCт SE	HK Control ΔCт Mean	HK Control ΔCт SE	ΔΔCт	Automatic Ct Threshold	Ct Threshold	Automatic Baseline	Baseline Start	Baseline End	Efficiency	Tm1	Tm2	Tm3	Comments	HIGHSD	OUTLIERRG	EXPFAIL	MTP
A1	ABA-1d	tubclin	UNKNOWN	SYBR	None				36.9576	37.5048	0.523115							TRUE	0.0217642	TRUE	3	35	1	77.288				Y	N	N	N
A2	ABA-1d	tubclin	UNKNOWN	SYBR	None				38	37.5048	0.523115							TRUE	0.0217642	TRUE	3	36	1	76.904				Y	N	N	N
A3	ABA-1d	tubclin	UNKNOWN	SYBR	None				37.5566	37.5048	0.523115							TRUE	0.0217642	TRUE	3	33	1	77.864				Y	N	N	N
A4	ABA-1d	Max4	UNKNOWN	SYBR	None	1	0.0672678	14.8659	35.2993	34.4328	1.2223		-1.87199	1.40249			0	TRUE	0.110837	TRUE	3	33	1	75.944				Y	N	N	N
A5	ABA-1d	Max4	UNKNOWN	SYBR	None	1	0.0672678	14.8659	34.9643	34.4328	1.2223		-1.87199	1.40249			0	TRUE	0.110837	TRUE	3	32	1	75.944				Y	N	N	N
A6	ABA-1d	Max4	UNKNOWN	SYBR	None	1	0.0672678	14.8659	33.0347	34.4328	1.2223		-1.87199	1.40249			0	TRUE	0.110837	TRUE	3	30	1	75.944				Y	N	N	N
A7	IAA-5d	Max4	UNKNOWN	SYBR	None	0.0537345	0.0248263	0.116304	34.7991	35.1741	0.567477		2.34602	0.401224			4.21801	TRUE	0.110837	TRUE	3	30	1	75.752				Y	N	N	N
A8	IAA-5d	Max4	UNKNOWN	SYBR	None	0.0537345	0.0248263	0.116304	35.0894	35.1741	0.567477		2.34602	0.401224			4.21801	TRUE	0.110837	TRUE	3	31	1	75.56				Y	N	N	N
A9	IAA-5d	Max4	UNKNOWN	SYBR	None	0.0537345	0.0248263	0.116304	35.6337	35.1741	0.567477		2.34602	0.401224			4.21801	TRUE	0.110837	TRUE	3	32	1	75.176	80.168			Y	N	N	Y
A10	IAA-5d	tubclin	UNKNOWN	SYBR	None				32.2784	32.7281	0.401139							TRUE	0.0217642	TRUE	3	31	1	77.864				N	N	N	N
A11	IAA-5d	tubclin	UNKNOWN	SYBR	None				33.0492	32.7281	0.401139							TRUE	0.0217642	TRUE	3	32	1	77.672				N	N	N	N
A12	IAA-5d	tubclin	UNKNOWN	SYBR	None				32.8566	32.7281	0.401139							TRUE	0.0217642	TRUE	3	31	1	77.672				N	N	N	N
B1	ABA-3d	tubclin	UNKNOWN	SYBR	None				33.6382	32.6073	0.962767							TRUE	0.0217642	TRUE	3	33	1	77.672				Y	N	N	N
B2	ABA-3d	tubclin	UNKNOWN	SYBR	None				32.4522	32.6073	0.962767							TRUE	0.0217642	TRUE	3	31	1	78.056				Y	N	N	N
B3	ABA-3d	tubclin	UNKNOWN	SYBR	None				31.7315	32.6073	0.962767							TRUE	0.0217642	TRUE	3	30	1	78.056				Y	N	N	N
B4	ABA-3d	Max4	UNKNOWN	SYBR	None				36.7498	36.7612	0.286471							TRUE	0.110837	TRUE	3	33	1	75.56				Y	N	N	N
B5	ABA-3d	Max4	UNKNOWN	SYBR	None				37.0533	36.7612	0.286471							TRUE	0.110837	TRUE	3	33	1	75.176				Y	N	N	N
B6	ABA-3d	Max4	UNKNOWN	SYBR	None				36.4807	36.7612	0.286471							TRUE	0.110837	TRUE	3	31	1	80.552	75.56			Y	N	N	Y
B7	Suc-1d	Max4	UNKNOWN	SYBR	None	0.0110867	0.0052893	0.0232384	35.3005	35.0914	0.373264		4.62304	0.38455			6.49503	TRUE	0.110837	TRUE	3	31	1	75.944				N	N	N	N
B8	Suc-1d	Max4	UNKNOWN	SYBR	None	0.0110867	0.0052893	0.0232384	34.6604	35.0914	0.373264		4.62304	0.38455			6.49503	TRUE	0.110837	TRUE	3	30	1	80.552	75.752			N	Y	N	Y
B9	Suc-1d	Max4	UNKNOWN	SYBR	None	0.0110867	0.0052893	0.0232384	35.3133	35.0914	0.373264		4.62304	0.38455			6.49503	TRUE	0.110837	TRUE	3	31	1	80.744	75.56			N	N	N	Y
B10	Suc-1d	tubclin	UNKNOWN	SYBR	None				29.8448	30.7774	0.551642							TRUE	0.0217642	TRUE	3	28	1	77.864				Y	N	N	N
B11	Suc-1d	tubclin	UNKNOWN	SYBR	None				30.8928	30.7774	0.551642							TRUE	0.0217642	TRUE	3	29	1	77.864				Y	N	N	N
B12	Suc-1d	tubclin	UNKNOWN	SYBR	None				30.6674	30.7774	0.551642							TRUE	0.0217642	TRUE	3	29	1	77.672				Y	N	N	N
C1	ABA-5d	tubclin	UNKNOWN	SYBR	None				34.6659	33.7593	0.901755							TRUE	0.0217642	TRUE	3	34	1	77.48				Y	N	N	N
C2	ABA-5d	tubclin	UNKNOWN	SYBR	None				33.7496	33.7593	0.901755							TRUE	0.0217642	TRUE	3	32	1	78.248				Y	N	N	N
C3	ABA-5d	tubclin	UNKNOWN	SYBR	None				32.8624	33.7593	0.901755							TRUE	0.0217642	TRUE	3	31	1	78.44				Y	N	N	N
C4	ABA-5d	Max4	UNKNOWN	SYBR	None	0.074025	0.0224632	0.243941	35.9888	35.6431	0.582036		1.88385	0.619658			3.75584	TRUE	0.110837	TRUE	3	32	1	75.944	80.552			Y	N	N	Y
C5	ABA-5d	Max4	UNKNOWN	SYBR	None	0.074025	0.0224632	0.243941	34.9712	35.6431	0.582036		1.88385	0.619658			3.75584	TRUE	0.110837	TRUE	3	31	1	75.56				Y	Y	N	N
C6	ABA-5d	Max4	UNKNOWN	SYBR	None	0.074025	0.0224632	0.243941	35.9695	35.6431	0.582036		1.88385	0.619658			3.75584	TRUE	0.110837	TRUE	3	31	1	75.752	80.744			Y	N	N	Y
C7	Suc-3d	Max4	UNKNOWN	SYBR	None	0.000729198	0.000253074	0.00210108	35.6329	36.1113	0.440219		8.54941	0.549895			10.4214	TRUE	0.110837	TRUE	3	31	1	76.136				Y	N	N	N
C8	Suc-3d	Max4	UNKNOWN	SYBR	None	0.000729198	0.000253074	0.00210108	36.2018	36.1113	0.440219		8.54941	0.549895			10.4214	TRUE	0.110837	TRUE	3	32	1	75.56	80.744			Y	N	N	Y
C9	Suc-3d	Max4	UNKNOWN	SYBR	None	0.000729198	0.000253074	0.00210108	36.4993	36.1113	0.440219		8.54941	0.549895			10.4214	TRUE	0.110837	TRUE	3	32	1	75.56	80.552			Y	N	N	Y
C10	Suc-3d	tubclin	UNKNOWN	SYBR	None				26.828	27.0869	0.384601							TRUE	0.0217642	TRUE	3	25	1	78.056				N	N	N	N
C11	Suc-3d	tubclin	UNKNOWN	SYBR	None				26.9039	27.0869	0.384601							TRUE	0.0217642	TRUE	3	25	1	78.056				N	N	N	N
C12	Suc-3d	tubclin	UNKNOWN	SYBR	None				27.5289	27.0869	0.384601							TRUE	0.0217642	TRUE	3	25	1	77.864				N	N	N	N
D1	6BA-1d	tubclin	UNKNOWN	SYBR	None				33.2018	33.1111	0.576159							TRUE	0.0217642	TRUE	3	34	1	78.248				Y	N	N	N
D2	6BA-1d	tubclin	UNKNOWN	SYBR	None				33.6366	33.1111	0.576159							TRUE	0.0217642	TRUE	3	32	1	78.248				Y	N	N	N
D3	6BA-1d	tubclin	UNKNOWN	SYBR	None				32.495	33.1111	0.576159							TRUE	0.0217642	TRUE	3	31	1	78.44				Y	N	N	N
D4	6BA-1d	Max4	UNKNOWN	SYBR	None	0.164363	0.0226697	1.19168	35.376	34.6432	0.845229		0.733056	1.02939			2.60505	TRUE	0.110837	TRUE	3	32	1	76.136				Y	N	N	N
D5	6BA-1d	Max4	UNKNOWN	SYBR	None	0.164363	0.0226697	1.19168	34.8351	34.6432	0.845229		0.733056	1.02939			2.60505	TRUE	0.110837	TRUE	3	31	1	76.136				Y	N	N	N
D6	6BA-1d	Max4	UNKNOWN	SYBR	None	0.164363	0.0226697	1.19168	33.7185	34.6432	0.845229		0.733056	1.02939			2.60505	TRUE	0.110837	TRUE	3	30	1	80.936	76.136			Y	N	N	Y
D7	Suc-5d	Max4	UNKNOWN	SYBR	None	0.00260522	0.000974439	0.00696519	34.543	34.4443	0.0911915		6.71239	0.510999			8.58438	TRUE	0.110837	TRUE	3	30	1	75.944	80.744			Y	N	N	Y
D8	Suc-5d	Max4	UNKNOWN	SYBR	None	0.00260522	0.000974439	0.00696519	34.4266	34.4443	0.0911915		6.71239	0.510999			8.58438	TRUE	0.110837	TRUE	3	30	1	75.752				Y	N	N	N
D9	Suc-5d	Max4	UNKNOWN	SYBR	None	0.00260522	0.000974439	0.00696519	34.3633	34.4443	0.0911915		6.71239	0.510999			8.58438	TRUE	0.110837	TRUE	3	32	1	75.56				Y	N	N	N
D10	Suc-5d	tubclin	UNKNOWN	SYBR	None				28.2823	28.2659	0.22225							TRUE	0.0217642	TRUE	3	27	1	78.248				N	N	N	N
D11	Suc-5d	tubclin	UNKNOWN	SYBR	None				28.0359	28.2659	0.22225							TRUE	0.0217642	TRUE	3	26	1	78.056				N	N	N	N
D12	Suc-5d	tubclin	UNKNOWN	SYBR	None				28.4795	28.2659	0.22225							TRUE	0.0217642	TRUE	3	27	1	77.864				N	N	N	N
E1	6BA-3d	tubclin	UNKNOWN	SYBR	None				33.7603	33.6665	0.0870897							TRUE	0.0217642	TRUE	3	33	1	78.248				Y	N	N	N
E2	6BA-3d	tubclin	UNKNOWN	SYBR	None				33.5882	33.6665	0.0870897							TRUE	0.0217642	TRUE	3	32	1	78.248				Y	N	N	N
E3	6BA-3d	tubclin	UNKNOWN	SYBR	None				33.6509	33.6665	0.0870897							TRUE	0.0217642	TRUE	3	27	1	77.864				Y	N	N	N
E4	6BA-3d	Max4	UNKNOWN	SYBR	None				34.0829	33.8876	0.207596							TRUE	0.110837	TRUE	3	30	1	80.744	75.944			N	N	N	Y
E5	6BA-3d	Max4	UNKNOWN	SYBR	None				33.6696	33.8876	0.207596							TRUE	0.110837	TRUE	3	29	1	80.744	75.752			N	N	N	Y
E6	6BA-3d	Max4	UNKNOWN	SYBR	None				33.9104	33.8876	0.207596							TRUE	0.110837	TRUE	3	30	1	80.744	75.56			N	N	N	Y
E7	GR24-1d	Max4	UNKNOWN	SYBR	None				34.2161	34.2753	0.0521485							TRUE	0.110837	TRUE	3	30	1	80.936	75.752			Y	N	N	Y
E8	GR24-1d	Max4	UNKNOWN	SYBR	None				34.2955	34.2753	0.0521485							TRUE	0.110837	TRUE	3	30	1	80.744	75.752			Y	N	N	Y
E9	GR24-1d	Max4	UNKNOWN	SYBR	None				34.3144	34.2753	0.0521485							TRUE	0.110837	TRUE	3	31	1	75.368	80.744			Y	N	N	Y
E10	GR24-1d	tubclin	UNKNOWN	SYBR	None				33.6015	34.111	0.443446							TRUE	0.0217642	TRUE	3	32	1	78.44				Y	N	N	N
E11	GR24-1d	tubclin	UNKNOWN	SYBR	None				34.3212	34.111	0.443446							TRUE	0.0217642	TRUE	3	32	1	78.248				Y	N	N	N
E12	GR24-1d	tubclin	UNKNOWN	SYBR	None				34.4102	34.111	0.443446							TRUE	0.0217642	TRUE	3	31	1	78.056				Y	N	N	N
F1	6BA-5d	tubclin	UNKNOWN	SYBR	None				38.2196	38.2196	0.186686							TRUE	0.0217642	TRUE	3	36	1	78.248				N	N	N	N
F2	6BA-5d	tubclin	UNKNOWN	SYBR	None				38.4063	38.2196	0.186686							TRUE	0.0217642	TRUE	3	37	1	77.48				N	N	Y	N
F3	6BA-5d	tubclin	UNKNOWN	SYBR	None				38.033	38.2196	0.186686							TRUE	0.0217642	TRUE	3	38	1	68.648	73.832			N	N	Y	Y
F4	6BA-5d	Max4	UNKNOWN	SYBR	None	2.23608			35.5524	35.5567	0.135831		-3.03296				-1.16097	TRUE	0.110837	TRUE	3	32	1	75.56				Y	N	N	N
F5	6BA-5d	Max4	UNKNOWN	SYBR	None	2.23608			35.423	35.5567	0.135831		-3.03296				-1.16097	TRUE	0.110837	TRUE	3	29	1	80.552	75.752			Y	N	N	Y
F6	6BA-5d	Max4	UNKNOWN	SYBR	None	2.23608			35.6946	35.5567	0.135831		-3.03296				-1.16097	TRUE	0.110837	TRUE	3	31	1	75.752				Y	N	N	N
F7	GR24-3d	Max4	UNKNOWN	SYBR	None				34.7692	34.7128	0.0992641							TRUE	0.110837	TRUE	3	30	1	80.936	75.752			N	N	N	Y
F8	GR24-3d	Max4	UNKNOWN	SYBR	None				34.7711	34.7128	0.0992641							TRUE	0.110837	TRUE	3	31	1	80.936	75.752			N	N	N	Y
F9	GR24-3d	Max4	UNKNOWN	SYBR	None				34.5982	34.7128	0.0992641							TRUE	0.110837	TRUE	3	31	1	75.752				N	Y	N	N
F10	GR24-3d	tubclin	UNKNOWN	SYBR	None				27.8275	27.5549	0.2366							TRUE	0.0217642	TRUE	3	26	1	78.248				Y	N	N	N
F11	GR24-3d	tubclin	UNKNOWN	SYBR	None				27.4336	27.5549	0.2366							TRUE	0.0217642	TRUE	3	29	1	77.864				Y	N	N	N
F12	GR24-3d	tubclin	UNKNOWN	SYBR	None				27.4035	27.5549	0.2366							TRUE	0.0217642	TRUE	3	25	1	77.864				Y	N	N	N
G1	IAA-1d	tubclin	UNKNOWN	SYBR	None				31.7832	31.5549	0.384903							TRUE	0.0217642	TRUE	3	32	1	77.864				Y	N	N	N
G2	IAA-1d	tubclin	UNKNOWN	SYBR	None				31.7709	31.5549	0.384903							TRUE	0.0217642	TRUE	3	30	1	78.056				Y	N	N	N
G3	IAA-1d	tubclin	UNKNOWN	SYBR	None				31.1105	31.5549	0.384903							TRUE	0.0217642	TRUE	3	30	1	78.248				Y	N	N	N
G4	IAA-1d	Max4	UNKNOWN	SYBR	None	0.0247518	0.00442538	0.13844	35.4288	35.5592	1.00385		3.46433	0.894547			5.33632	TRUE	0.110837	TRUE	3	31	1	75.56	80.552			Y	N	N	Y
G5	IAA-1d	Max4	UNKNOWN	SYBR	None	0.0247518	0.00442538	0.13844	36.6219	35.5592	1.00385		3.46433	0.894547			5.33632	TRUE	0.110837	TRUE	3	33	1	75.752				Y	N	N	N
G6	IAA-1d	Max4	UNKNOWN	SYBR	None	0.0247518	0.00442538	0.13844	34.6269	35.5592	1.00385		3.46433	0.894547			5.33632	TRUE	0.110837	TRUE	3	30	1	75.944	80.552			Y	N	N	Y
G7	GR24-5d	Max4	UNKNOWN	SYBR	None	0.00203722	0.000648559	0.00639922	34.6957	35.4678	1.00715		7.06719	0.594751			8.93918	TRUE	0.110837	TRUE	3	30	1	75.944	80.744			Y	N	N	Y
G8	GR24-5d	Max4	UNKNOWN	SYBR	None	0.00203722	0.000648559	0.00639922	36.607	35.4678	1.00715		7.06719	0.594751			8.93918	TRUE	0.110837	TRUE	3	32	1	75.944				Y	N	N	N
G9	GR24-5d	Max4	UNKNOWN	SYBR	None	0.00203722	0.000648559	0.00639922	35.1008	35.4678	1.00715		7.06719	0.594751			8.93918	TRUE	0.110837	TRUE	3	31	1	75.752	80.552			Y	N	N	Y
G10	GR24-5d	tubclin	UNKNOWN	SYBR	None				28.6426	28.4006	0.216402							TRUE	0.0217642	TRUE	3	27	1	78.056				N	N	N	N
G11	GR24-5d	tubclin	UNKNOWN	SYBR	None				28.2256	28.4006	0.216402							TRUE	0.0217642	TRUE	3	26	1	78.056				N	N	N	N
G12	GR24-5d	tubclin	UNKNOWN	SYBR	None				28.3336	28.4006	0.216402							TRUE	0.0217642	TRUE	3	27	1	77.672				N	N	N	N
H1	IAA-3d	tubclin	UNKNOWN	SYBR	None				31.5663	31.5545	0.05848							TRUE	0.0217642	TRUE	3	32	1	77.672				Y	N	N	N
H2	IAA-3d	tubclin	UNKNOWN	SYBR	None				31.6063	31.5545	0.05848							TRUE	0.0217642	TRUE	3	30	1	77.864				Y	N	N	N
H3	IAA-3d	tubclin	UNKNOWN	SYBR	None				31.4911	31.5545	0.05848							TRUE	0.0217642	TRUE	3	30	1	77.864				Y	N	N	N
H4	IAA-3d	Max4	UNKNOWN	SYBR	None	0.0245402	0.007301	0.0824848	35.492	35.4853	0.743469		3.47672	0.629936			5.34871	TRUE	0.110837	TRUE	3	32	1	75.56				Y	N	N	N
H5	IAA-3d	Max4	UNKNOWN	SYBR	None	0.0245402	0.007301	0.0824848	36.2254	35.4853	0.743469		3.47672	0.629936			5.34871	TRUE	0.110837	TRUE	3	32	1	75.368				Y	N	N	N
H6	IAA-3d	Max4	UNKNOWN	SYBR	None	0.0245402	0.007301	0.0824848	34.7385	35.4853	0.743469		3.47672	0.629936			5.34871	TRUE	0.110837	TRUE	3	30	1	75.752				Y	N	N	N
H7	CK	Max4	UNKNOWN	SYBR	None				34.6944	34.7001	0.0881804							TRUE	0.110837	TRUE	3	30	1	75.368	80.552			N	N	N	Y
H8	CK	Max4	UNKNOWN	SYBR	None				34.6149	34.7001	0.0881804							TRUE	0.110837	TRUE	3	30	1	75.176	80.36			N	N	N	Y
H9	CK	Max4	UNKNOWN	SYBR	None				34.791	34.7001	0.0881804							TRUE	0.110837	TRUE	3	31	1	80.36	74.792			N	N	N	Y
H10	CK	tubclin	UNKNOWN	SYBR	None				30.7761	31.032	0.265622							TRUE	0.0217642	TRUE	3	29	1	77.864				N	N	N	N
H11	CK	tubclin	UNKNOWN	SYBR	None				31.0134	31.032	0.265622							TRUE	0.0217642	TRUE	3	30	1	77.864				N	N	N	N
H12	CK	tubclin	UNKNOWN	SYBR	None				31.3064	31.032	0.265622							TRUE	0.0217642	TRUE	3	30	1	77.288				N	N	N	N
Analysis Type	Singleplex
Endogenous Control	tubclin
RQ Min/Max Confidence Level	95.0
Reference Sample	ABA-1d

## Sheet: cold
Block Type	96alum
Chemistry	SYBR_GREEN
Experiment File Name	D:\20220422-1.eds
Experiment Run End Time	2022-04-22 09:25:49
Instrument Type	sds7500
Passive Reference	ROX
Well	Sample Name	Target Name	Task	Reporter	Quencher	RQ	RQ Min	RQ Max	Cт	Cт Mean	Cт SD	ΔCт	ΔCт Mean	ΔCт SE	HK Control ΔCт Mean	HK Control ΔCт SE	ΔΔCт	Automatic Ct Threshold	Ct Threshold	Automatic Baseline	Baseline Start	Baseline End	Efficiency	Tm1	Tm2	Tm3	Comments	HIGHSD	OUTLIERRG	EXPFAIL	MTP
A1	cold-CK	tubclin	UNKNOWN	SYBR	None				29.9576	29.5548	0.40382							TRUE	0.0217642	TRUE	3	35	1	77.288				Y	N	N	N
A2	cold-CK	tubclin	UNKNOWN	SYBR	None				29.15	29.5548	0.40382							TRUE	0.0217642	TRUE	3	36	1	76.904				Y	N	N	N
A3	cold-CK	tubclin	UNKNOWN	SYBR	None				29.5566	29.5548	0.40382							TRUE	0.0217642	TRUE	3	33	1	77.864				Y	N	N	N
A4	cold-CK	Max1	UNKNOWN	SYBR	None				31.2993	31.5528	0.359567							TRUE	0.110837	TRUE	3	33	1	75.944				Y	N	N	N
A5	cold-CK	Max1	UNKNOWN	SYBR	None				31.9643	31.5528	0.359567							TRUE	0.110837	TRUE	3	32	1	75.944				Y	N	N	N
A6	cold-CK	Max1	UNKNOWN	SYBR	None				31.3947	31.5528	0.359567							TRUE	0.110837	TRUE	3	30	1	75.944				Y	N	N	N
A7	cold-CK	Max3	UNKNOWN	SYBR	None				33.7991	33.2484	0.490906							TRUE	0.110837	TRUE	3	30	1	75.752				Y	N	N	N
A8	cold-CK	Max3	UNKNOWN	SYBR	None				33.0894	33.2484	0.490906							TRUE	0.110837	TRUE	3	31	1	75.56				Y	N	N	N
A9	cold-CK	Max3	UNKNOWN	SYBR	None				32.8567	33.2484	0.490906							TRUE	0.110837	TRUE	3	32	1	75.176	80.168			Y	N	N	Y
A10	cold-CK	tubclin	UNKNOWN	SYBR	None				15.2784	15.9971	0.798212							TRUE	0.0217642	TRUE	3	31	1	77.864				N	N	N	N
A11	cold-CK	tubclin	UNKNOWN	SYBR	None				16.8562	15.9971	0.798212							TRUE	0.0217642	TRUE	3	32	1	77.672				N	N	N	N
A12	cold-CK	tubclin	UNKNOWN	SYBR	None				15.8566	15.9971	0.798212							TRUE	0.0217642	TRUE	3	31	1	77.672				N	N	N	N
B1	cold-1d	tubclin	UNKNOWN	SYBR	None				33.3382	32.5073	0.962767							TRUE	0.0217642	TRUE	3	33	1	77.672				Y	N	N	N
B2	cold-1d	tubclin	UNKNOWN	SYBR	None				32.4522	32.5073	0.962767							TRUE	0.0217642	TRUE	3	31	1	78.056				Y	N	N	N
B3	cold-1d	tubclin	UNKNOWN	SYBR	None				31.7315	32.5073	0.962767							TRUE	0.0217642	TRUE	3	30	1	78.056				Y	N	N	N
B4	cold-1d	Max1	UNKNOWN	SYBR	None				32.7498	32.2442	0.442197							TRUE	0.110837	TRUE	3	33	1	75.56				Y	N	N	N
B5	cold-1d	Max1	UNKNOWN	SYBR	None				32.0533	32.2442	0.442197							TRUE	0.110837	TRUE	3	33	1	75.176				Y	N	N	N
B6	cold-1d	Max1	UNKNOWN	SYBR	None				31.9297	32.2442	0.442197							TRUE	0.110837	TRUE	3	31	1	80.552	75.56			Y	N	N	Y
B7	cold-1d	Max3	UNKNOWN	SYBR	None				31.3005	31.4184	0.209651							TRUE	0.110837	TRUE	3	31	1	75.944				N	N	N	N
B8	cold-1d	Max3	UNKNOWN	SYBR	None				31.6604	31.4184	0.209651							TRUE	0.110837	TRUE	3	30	1	80.552	75.752			N	Y	N	Y
B9	cold-1d	Max3	UNKNOWN	SYBR	None				31.2942	31.4184	0.209651							TRUE	0.110837	TRUE	3	31	1	80.744	75.56			N	N	N	Y
B10	cold-1d	tubclin	UNKNOWN	SYBR	None				24.8448	24.7774	0.0960007							TRUE	0.0217642	TRUE	3	28	1	77.864				Y	N	N	N
B11	cold-1d	tubclin	UNKNOWN	SYBR	None				24.8198	24.7774	0.0960007							TRUE	0.0217642	TRUE	3	29	1	77.864				Y	N	N	N
B12	cold-1d	tubclin	UNKNOWN	SYBR	None				24.6674	24.7774	0.0960007							TRUE	0.0217642	TRUE	3	29	1	77.672				Y	N	N	N
C1	cold-2d	tubclin	UNKNOWN	SYBR	None				28.6659	28.5553	0.267328							TRUE	0.0217642	TRUE	3	34	1	77.48				Y	N	N	N
C2	cold-2d	tubclin	UNKNOWN	SYBR	None				28.7496	28.5553	0.267328							TRUE	0.0217642	TRUE	3	32	1	78.248				Y	N	N	N
C3	cold-2d	tubclin	UNKNOWN	SYBR	None				28.2504	28.5553	0.267328							TRUE	0.0217642	TRUE	3	31	1	78.44				Y	N	N	N
C4	cold-2d	Max1	UNKNOWN	SYBR	None				29.9888	29.2891	0.606733							TRUE	0.110837	TRUE	3	32	1	75.944	80.552			Y	N	N	Y
C5	cold-2d	Max1	UNKNOWN	SYBR	None				28.9712	29.2891	0.606733							TRUE	0.110837	TRUE	3	31	1	75.56				Y	Y	N	N
C6	cold-2d	Max1	UNKNOWN	SYBR	None				28.9075	29.2891	0.606733							TRUE	0.110837	TRUE	3	31	1	75.752	80.744			Y	N	N	Y
C7	cold-2d	Max3	UNKNOWN	SYBR	None				33.6329	33.6511	0.458688							TRUE	0.110837	TRUE	3	31	1	76.136				Y	N	N	N
C8	cold-2d	Max3	UNKNOWN	SYBR	None				33.2018	33.6511	0.458688							TRUE	0.110837	TRUE	3	32	1	75.56	80.744			Y	N	N	Y
C9	cold-2d	Max3	UNKNOWN	SYBR	None				34.1187	33.6511	0.458688							TRUE	0.110837	TRUE	3	32	1	75.56	80.552			Y	N	N	Y
C10	cold-2d	tubclin	UNKNOWN	SYBR	None				24.828	24.6179	0.182667							TRUE	0.0217642	TRUE	3	25	1	78.056				N	N	N	N
C11	cold-2d	tubclin	UNKNOWN	SYBR	None				24.4969	24.6179	0.182667							TRUE	0.0217642	TRUE	3	25	1	78.056				N	N	N	N
C12	cold-2d	tubclin	UNKNOWN	SYBR	None				24.5289	24.6179	0.182667							TRUE	0.0217642	TRUE	3	25	1	77.864				N	N	N	N
D1	cold-CK	tubclin	UNKNOWN	SYBR	None				28.0227	28.5554	0.780868							TRUE	0.0217642	TRUE	3	34	1	78.248				Y	N	N	N
D2	cold-CK	tubclin	UNKNOWN	SYBR	None				28.1917	28.5554	0.780868							TRUE	0.0217642	TRUE	3	32	1	78.248				Y	N	N	N
D3	cold-CK	tubclin	UNKNOWN	SYBR	None				29.4517	28.5554	0.780868							TRUE	0.0217642	TRUE	3	31	1	78.44				Y	N	N	N
D4	cold-CK	Max2	UNKNOWN	SYBR	None				34.2018	34.3641	0.237379							TRUE	0.110837	TRUE	3	32	1	76.136				Y	N	N	N
D5	cold-CK	Max2	UNKNOWN	SYBR	None				34.6366	34.3641	0.237379							TRUE	0.110837	TRUE	3	31	1	76.136				Y	N	N	N
D6	cold-CK	Max2	UNKNOWN	SYBR	None				34.254	34.3641	0.237379							TRUE	0.110837	TRUE	3	30	1	80.936	76.136			Y	N	N	Y
D7	cold-CK	Max4	UNKNOWN	SYBR	None				35.543	35.2653	0.384651							TRUE	0.110837	TRUE	3	30	1	75.944	80.744			Y	N	N	Y
D8	cold-CK	Max4	UNKNOWN	SYBR	None				35.4266	35.2653	0.384651							TRUE	0.110837	TRUE	3	30	1	75.752				Y	N	N	N
D9	cold-CK	Max4	UNKNOWN	SYBR	None				34.8263	35.2653	0.384651							TRUE	0.110837	TRUE	3	32	1	75.56				Y	N	N	N
D10	cold-CK	tubclin	UNKNOWN	SYBR	None				36.2823	36.6859	0.537391							TRUE	0.0217642	TRUE	3	27	1	78.248				N	N	N	N
D11	cold-CK	tubclin	UNKNOWN	SYBR	None				37.2959	36.6859	0.537391							TRUE	0.0217642	TRUE	3	26	1	78.056				N	N	N	N
D12	cold-CK	tubclin	UNKNOWN	SYBR	None				36.4795	36.6859	0.537391							TRUE	0.0217642	TRUE	3	27	1	77.864				N	N	N	N
E1	cold-1d	tubclin	UNKNOWN	SYBR	None				33.7603	33.5461	0.237953							TRUE	0.0217642	TRUE	3	33	1	78.248				Y	N	N	N
E2	cold-1d	tubclin	UNKNOWN	SYBR	None				33.5882	33.5461	0.237953							TRUE	0.0217642	TRUE	3	32	1	78.248				Y	N	N	N
E3	cold-1d	tubclin	UNKNOWN	SYBR	None				33.29	33.5461	0.237953							TRUE	0.0217642	TRUE	3	27	1	77.864				Y	N	N	N
E4	cold-1d	Max2	UNKNOWN	SYBR	None				37.0829	37.0946	0.56915							TRUE	0.110837	TRUE	3	30	1	80.744	75.944			N	N	N	Y
E5	cold-1d	Max2	UNKNOWN	SYBR	None				37.6696	37.0946	0.56915							TRUE	0.110837	TRUE	3	29	1	80.744	75.752			N	N	N	Y
E6	cold-1d	Max2	UNKNOWN	SYBR	None				36.5314	37.0946	0.56915							TRUE	0.110837	TRUE	3	30	1	80.744	75.56			N	N	N	Y
E7	cold-1d	Max4	UNKNOWN	SYBR	None				32.2161	32.5553	0.504847							TRUE	0.110837	TRUE	3	30	1	80.936	75.752			Y	N	N	Y
E8	cold-1d	Max4	UNKNOWN	SYBR	None				33.1355	32.5553	0.504847							TRUE	0.110837	TRUE	3	30	1	80.744	75.752			Y	N	N	Y
E9	cold-1d	Max4	UNKNOWN	SYBR	None				32.3144	32.5553	0.504847							TRUE	0.110837	TRUE	3	31	1	75.368	80.744			Y	N	N	Y
E10	cold-1d	tubclin	UNKNOWN	SYBR	None				7.60152	7.49898	0.0963861							TRUE	0.0217642	TRUE	3	32	1	78.44				Y	N	N	N
E11	cold-1d	tubclin	UNKNOWN	SYBR	None				7.48519	7.49898	0.0963861							TRUE	0.0217642	TRUE	3	32	1	78.248				Y	N	N	N
E12	cold-1d	tubclin	UNKNOWN	SYBR	None				7.41024	7.49898	0.0963861							TRUE	0.0217642	TRUE	3	31	1	78.056				Y	N	N	N
F1	cold-2d	tubclin	UNKNOWN	SYBR	None				24.2196	24.7766	0.808484							TRUE	0.0217642	TRUE	3	36	1	78.248				N	N	N	N
F2	cold-2d	tubclin	UNKNOWN	SYBR	None				24.4063	24.7766	0.808484							TRUE	0.0217642	TRUE	3	37	1	77.48				N	N	Y	N
F3	cold-2d	tubclin	UNKNOWN	SYBR	None				25.704	24.7766	0.808484							TRUE	0.0217642	TRUE	3	38	1	68.648	73.832			N	N	Y	Y
F4	cold-2d	Max2	UNKNOWN	SYBR	None				26.5524	26.9107	0.50242							TRUE	0.110837	TRUE	3	32	1	75.56				Y	N	N	N
F5	cold-2d	Max2	UNKNOWN	SYBR	None				27.485	26.9107	0.50242							TRUE	0.110837	TRUE	3	29	1	80.552	75.752			Y	N	N	Y
F6	cold-2d	Max2	UNKNOWN	SYBR	None				26.6946	26.9107	0.50242							TRUE	0.110837	TRUE	3	31	1	75.752				Y	N	N	N
F7	cold-2d	Max4	UNKNOWN	SYBR	None				36.7692	36.5548	0.372925							TRUE	0.110837	TRUE	3	30	1	80.936	75.752			N	N	N	Y
F8	cold-2d	Max4	UNKNOWN	SYBR	None				36.7711	36.5548	0.372925							TRUE	0.110837	TRUE	3	31	1	80.936	75.752			N	N	N	Y
F9	cold-2d	Max4	UNKNOWN	SYBR	None				36.1242	36.5548	0.372925							TRUE	0.110837	TRUE	3	31	1	75.752				N	Y	N	N
F10	cold-2d	tubclin	UNKNOWN	SYBR	None				34.8275	34.4919	0.301331							TRUE	0.0217642	TRUE	3	26	1	78.248				Y	N	N	N
F11	cold-2d	tubclin	UNKNOWN	SYBR	None				34.2446	34.4919	0.301331							TRUE	0.0217642	TRUE	3	29	1	77.864				Y	N	N	N
F12	cold-2d	tubclin	UNKNOWN	SYBR	None				34.4035	34.4919	0.301331							TRUE	0.0217642	TRUE	3	25	1	77.864				Y	N	N	N
Analysis Type	Singleplex
Endogenous Control	tubclin
RQ Min/Max Confidence Level	95.0
Reference Sample	cold-CK

## Sheet: dry-Max1-Max2
Block Type	96alum
Chemistry	SYBR_GREEN
Experiment File Name	D:\20220422-2.eds
Experiment Run End Time	2022-04-22 13:02:29
Instrument Type	sds7500
Passive Reference	ROX
Well	Sample Name	Target Name	Task	Reporter	Quencher	RQ	RQ Min	RQ Max	Cт	Cт Mean	Cт SD	ΔCт	ΔCт Mean	ΔCт SE	HK Control ΔCт Mean	HK Control ΔCт SE	ΔΔCт	Automatic Ct Threshold	Ct Threshold	Automatic Baseline	Baseline Start	Baseline End	Efficiency	Tm1	Tm2	Tm3	Comments	HIGHSD	NOAMP	OUTLIERRG	EXPFAIL	MTP
A1	dry-CK	tubclin	UNKNOWN	SYBR	None				24.0241	24.7311	0.632211							TRUE	0.388772	TRUE	3	29	1	77.6648				Y	N	N	N	N
A2	dry-CK	tubclin	UNKNOWN	SYBR	None				24.9272	24.7311	0.632211							TRUE	0.388772	TRUE	3	27	1	77.8547				Y	N	N	N	N
A3	dry-CK	tubclin	UNKNOWN	SYBR	None				25.242	24.7311	0.632211							TRUE	0.388772	TRUE	3	24	1	78.0447				Y	N	N	N	N
A4	dry-CK	Max1	UNKNOWN	SYBR	None				24.7732	24.7727	0.245206							TRUE	0.0244637	TRUE	3	39	1	64.1788				N	Y	N	Y	N
A5	dry-CK	Max1	UNKNOWN	SYBR	None				24.5272	24.7727	0.245206							TRUE	0.0244637	TRUE	3	39	1	64.9385				N	Y	N	Y	N
A6	dry-CK	Max1	UNKNOWN	SYBR	None				25.0176	24.7727	0.245206							TRUE	0.0244637	TRUE	3	39	1	61.7095	65.3184			N	Y	N	Y	Y
A7	dry-CK	Max2	UNKNOWN	SYBR	None				35.2435	35.4222	0.314215							TRUE	0.0244637	TRUE	3	30	1	81.2737				Y	N	N	N	N
A8	dry-CK	Max2	UNKNOWN	SYBR	None				35.238	35.4222	0.314215							TRUE	0.0244637	TRUE	3	39	1	61.8994				N	N	N	Y	N
A9	dry-CK	Max2	UNKNOWN	SYBR	None				35.785	35.4222	0.314215							TRUE	0.0244637	TRUE	3	35	1	79.9441				Y	N	N	N	N
A10	dry-CK	tubclin	UNKNOWN	SYBR	None				23.7134	23.5536	0.466508							TRUE	0.388772	TRUE	3	23	1	77.6648				N	N	N	N	N
A11	dry-CK	tubclin	UNKNOWN	SYBR	None				23.0282	23.5536	0.466508							TRUE	0.388772	TRUE	3	23	1	77.6648				N	N	N	N	N
A12	dry-CK	tubclin	UNKNOWN	SYBR	None				23.9191	23.5536	0.466508							TRUE	0.388772	TRUE	3	21	1	77.4749				N	N	N	N	N
B1	dry-1d	tubclin	UNKNOWN	SYBR	None				33.9482	33.5019	0.434022							TRUE	0.388772	TRUE	3	25	1	77.8547				Y	N	N	N	N
B2	dry-1d	tubclin	UNKNOWN	SYBR	None				33.0813	33.5019	0.434022							TRUE	0.388772	TRUE	3	23	1	78.0447				Y	N	N	N	N
B3	dry-1d	tubclin	UNKNOWN	SYBR	None				33.4764	33.5019	0.434022							TRUE	0.388772	TRUE	3	22	1	78.2346				Y	N	N	N	N
B4	dry-1d	Max1	UNKNOWN	SYBR	None				28.5484	28.8254	0.504236							TRUE	0.0244637	TRUE	3	33	1	81.4637				Y	N	N	N	N
B5	dry-1d	Max1	UNKNOWN	SYBR	None				29.4074	28.8254	0.504236							TRUE	0.0244637	TRUE	3	4	1	61.7095				Y	N	N	N	N
B6	dry-1d	Max1	UNKNOWN	SYBR	None				28.5203	28.8254	0.504236							TRUE	0.0244637	TRUE	3	30	1	81.4637				Y	N	N	N	N
B7	dry-1d	Max2	UNKNOWN	SYBR	None				32.6617	32.9147	0.231346							TRUE	0.0244637	TRUE	3	39	1	62.2793				N	Y	N	Y	N
B8	dry-1d	Max2	UNKNOWN	SYBR	None				33.1156	32.9147	0.231346							TRUE	0.0244637	TRUE	3	39	1	61.8994				N	Y	N	Y	N
B9	dry-1d	Max2	UNKNOWN	SYBR	None				32.9667	32.9147	0.231346							TRUE	0.0244637	TRUE	3	32	1	81.4637				N	N	N	N	N
B10	dry-1d	tubclin	UNKNOWN	SYBR	None				22.2084	21.9868	0.216883							TRUE	0.388772	TRUE	3	21	1	78.0447				N	N	N	N	N
B11	dry-1d	tubclin	UNKNOWN	SYBR	None				21.7749	21.9868	0.216883							TRUE	0.388772	TRUE	3	20	1	77.8547				N	N	N	N	N
B12	dry-1d	tubclin	UNKNOWN	SYBR	None				21.9771	21.9868	0.216883							TRUE	0.388772	TRUE	3	21	1	77.6648				N	N	N	N	N
C1	dry-2d	tubclin	UNKNOWN	SYBR	None				33.363	33.9877	0.671202							TRUE	0.388772	TRUE	3	27	1	78.0447				Y	N	N	N	N
C2	dry-2d	tubclin	UNKNOWN	SYBR	None				33.9027	33.9877	0.671202							TRUE	0.388772	TRUE	3	25	1	78.2346				Y	N	N	N	N
C3	dry-2d	tubclin	UNKNOWN	SYBR	None				34.6973	33.9877	0.671202							TRUE	0.388772	TRUE	3	23	1	78.4246				Y	N	N	N	N
C4	dry-2d	Max1	UNKNOWN	SYBR	None				35.6617	35.679	0.274733							TRUE	0.0244637	TRUE	3	39	1	61.7095				N	Y	N	Y	N
C5	dry-2d	Max1	UNKNOWN	SYBR	None				35.4134	35.679	0.274733							TRUE	0.0244637	TRUE	3	39	1	61.5196	70.257			N	Y	N	Y	Y
C6	dry-2d	Max1	UNKNOWN	SYBR	None				35.962	35.679	0.274733							TRUE	0.0244637	TRUE	3	39	1	61.8994				N	Y	N	Y	N
C7	dry-2d	Max2	UNKNOWN	SYBR	None				39.6233	39.0825	0.727916							TRUE	0.0244637	TRUE	3	29	1	81.6536				N	N	N	N	N
C8	dry-2d	Max2	UNKNOWN	SYBR	None				38.2548	39.0825	0.727916							TRUE	0.0244637	TRUE	3	29	1	81.4637				N	N	N	N	N
C9	dry-2d	Max2	UNKNOWN	SYBR	None				39.3693	39.0825	0.727916							TRUE	0.0244637	TRUE	3	30	1	81.4637				N	N	N	N	N
C10	dry-2d	tubclin	UNKNOWN	SYBR	None				27.3006	27.7665	0.40544							TRUE	0.388772	TRUE	3	19	1	78.2346				N	N	N	N	N
C11	dry-2d	tubclin	UNKNOWN	SYBR	None				28.0391	27.7665	0.40544							TRUE	0.388772	TRUE	3	19	1	78.0447				N	N	N	N	N
C12	dry-2d	tubclin	UNKNOWN	SYBR	None				27.9599	27.7665	0.40544							TRUE	0.388772	TRUE	3	17	1	77.8547				N	N	N	N	N
D1	dry-4d	tubclin	UNKNOWN	SYBR	None				35.1741	35.5183	0.299494							TRUE	0.388772	TRUE	3	21	1	78.2346				Y	N	N	N	N
D2	dry-4d	tubclin	UNKNOWN	SYBR	None				35.7194	35.5183	0.299494							TRUE	0.388772	TRUE	3	23	1	78.2346				Y	N	N	N	N
D3	dry-4d	tubclin	UNKNOWN	SYBR	None				35.6613	35.5183	0.299494							TRUE	0.388772	TRUE	3	20	1	78.4246				Y	N	N	N	N
D4	dry-4d	Max1	UNKNOWN	SYBR	None				31.5263	31.6662	0.317346							TRUE	0.0244637	TRUE	3	27	1	81.4637				Y	N	N	N	N
D5	dry-4d	Max1	UNKNOWN	SYBR	None				32.0294	31.6662	0.317346							TRUE	0.0244637	TRUE	3	30	1	81.8436				Y	N	N	N	N
D6	dry-4d	Max1	UNKNOWN	SYBR	None				31.4428	31.6662	0.317346							TRUE	0.0244637	TRUE	3	28	1	81.6536				Y	N	N	N	N
D7	dry-4d	Max2	UNKNOWN	SYBR	None				34.9332	35.3972	0.475251							TRUE	0.0244637	TRUE	3	39	1	61.8994	81.8436			N	Y	N	Y	Y
D8	dry-4d	Max2	UNKNOWN	SYBR	None				35.8829	35.3972	0.475251							TRUE	0.0244637	TRUE	3	32	1	81.8436				N	N	N	N	N
D9	dry-4d	Max2	UNKNOWN	SYBR	None				35.3754	35.3972	0.475251							TRUE	0.0244637	TRUE	3	32	1	81.6536				N	N	N	N	N
D10	dry-4d	tubclin	UNKNOWN	SYBR	None				25.5105	25.7234	0.230062							TRUE	0.388772	TRUE	3	20	1	78.2346				N	N	N	N	N
D11	dry-4d	tubclin	UNKNOWN	SYBR	None				25.6923	25.7234	0.230062							TRUE	0.388772	TRUE	3	19	1	78.0447				N	N	N	N	N
D12	dry-4d	tubclin	UNKNOWN	SYBR	None				25.9674	25.7234	0.230062							TRUE	0.388772	TRUE	3	20	1	77.8547				N	N	N	N	N
E1	dry-8d	tubclin	UNKNOWN	SYBR	None				28.3765	28.5548	0.208777							TRUE	0.388772	TRUE	3	22	1	78.2346				N	N	N	N	N
E2	dry-8d	tubclin	UNKNOWN	SYBR	None				28.5034	28.5548	0.208777							TRUE	0.388772	TRUE	3	22	1	78.4246				N	N	N	N	N
E3	dry-8d	tubclin	UNKNOWN	SYBR	None				28.7845	28.5548	0.208777							TRUE	0.388772	TRUE	3	19	1	78.4246				N	N	N	N	N
E4	dry-8d	Max1	UNKNOWN	SYBR	None				30.2993	29.2893	1.25629							TRUE	0.0244637	TRUE	3	29	1	81.6536				N	N	N	N	N
E5	dry-8d	Max1	UNKNOWN	SYBR	None				27.8825	29.2893	1.25629							TRUE	0.0244637	TRUE	3	28	1	81.6536				N	N	N	N	N
E6	dry-8d	Max1	UNKNOWN	SYBR	None				29.686	29.2893	1.25629							TRUE	0.0244637	TRUE	3	28	1	81.6536				N	N	N	N	N
E7	dry-8d	Max2	UNKNOWN	SYBR	None				33.855	33.7065								TRUE	0.0244637	TRUE	3	39	1	62.0894				N	Y	N	Y	N
E8	dry-8d	Max2	UNKNOWN	SYBR	None				33.1966	33.7065								TRUE	0.0244637	TRUE	3	39	1	61.8994	81.0838			N	Y	N	Y	Y
E9	dry-8d	Max2	UNKNOWN	SYBR	None				34.0679	33.7065								TRUE	0.0244637	TRUE	3	39	1	61.8994	78.9944			N	Y	N	Y	Y
E10	dry-8d	tubclin	UNKNOWN	SYBR	None				23.5373	23.9143	0.328942							TRUE	0.388772	TRUE	3	22	1	78.4246				N	N	N	N	N
E11	dry-8d	tubclin	UNKNOWN	SYBR	None				24.1428	23.9143	0.328942							TRUE	0.388772	TRUE	3	21	1	78.2346				N	N	N	N	N
E12	dry-8d	tubclin	UNKNOWN	SYBR	None				24.0628	23.9143	0.328942							TRUE	0.388772	TRUE	3	22	1	77.8547				N	N	N	N	N
Analysis Type	Singleplex
Endogenous Control	tubclin
RQ Min/Max Confidence Level	95.0
Reference Sample	dry-CK

## Sheet: dry-Max3-Max4
Block Type	96alum
Chemistry	SYBR_GREEN
Experiment File Name	D:\20220422-3.eds
Experiment Run End Time	2022-04-22 16:02:29
Instrument Type	sds7500
Passive Reference	ROX
Well	Sample Name	Target Name	Task	Reporter	Quencher	RQ	RQ Min	RQ Max	Cт	Cт Mean	Cт SD	ΔCт	ΔCт Mean	ΔCт SE	HK Control ΔCт Mean	HK Control ΔCт SE	ΔΔCт	Automatic Ct Threshold	Ct Threshold	Automatic Baseline	Baseline Start	Baseline End	Efficiency	Tm1	Tm2	Tm3	Comments	HIGHSD	NOAMP	OUTLIERRG	EXPFAIL	MTP
A1	dry-CK	tubclin	UNKNOWN	SYBR	None				23.4165	23.8925	0.466087							TRUE	0.388772	TRUE	3	29	1	77.6648				Y	N	N	N	N
A2	dry-CK	tubclin	UNKNOWN	SYBR	None				24.348	23.8925	0.466087							TRUE	0.388772	TRUE	3	27	1	77.8547				Y	N	N	N	N
A3	dry-CK	tubclin	UNKNOWN	SYBR	None				23.913	23.8925	0.466087							TRUE	0.388772	TRUE	3	24	1	78.0447				Y	N	N	N	N
A4	dry-CK	Max3	UNKNOWN	SYBR	None				32.7574	32.1474	0.572806							TRUE	0.0244637	TRUE	3	39	1	64.1788				N	Y	N	Y	N
A5	dry-CK	Max3	UNKNOWN	SYBR	None				32.0638	32.1474	0.572806							TRUE	0.0244637	TRUE	3	39	1	64.9385				N	Y	N	Y	N
A6	dry-CK	Max3	UNKNOWN	SYBR	None				31.621	32.1474	0.572806							TRUE	0.0244637	TRUE	3	39	1	61.7095	65.3184			N	Y	N	Y	Y
A7	dry-CK	Max4	UNKNOWN	SYBR	None				37.5259	37.9376	0.358233							TRUE	0.0244637	TRUE	3	30	1	81.2737				Y	N	N	N	N
A8	dry-CK	Max4	UNKNOWN	SYBR	None				38.108	37.9376	0.358233							TRUE	0.0244637	TRUE	3	39	1	61.8994				N	N	N	Y	N
A9	dry-CK	Max4	UNKNOWN	SYBR	None				38.1787	37.9376	0.358233							TRUE	0.0244637	TRUE	3	35	1	79.9441				Y	N	N	N	N
A10	dry-CK	tubclin	UNKNOWN	SYBR	None				27.5823	27.6531	0.153644							TRUE	0.388772	TRUE	3	23	1	77.6648				N	N	N	N	N
A11	dry-CK	tubclin	UNKNOWN	SYBR	None				27.5476	27.6531	0.153644							TRUE	0.388772	TRUE	3	23	1	77.6648				N	N	N	N	N
A12	dry-CK	tubclin	UNKNOWN	SYBR	None				27.8294	27.6531	0.153644							TRUE	0.388772	TRUE	3	21	1	77.4749				N	N	N	N	N
B1	dry-1d	tubclin	UNKNOWN	SYBR	None				33.7567	33.4111	1.12718							TRUE	0.388772	TRUE	3	25	1	77.8547				Y	N	N	N	N
B2	dry-1d	tubclin	UNKNOWN	SYBR	None				32.1516	33.4111	1.12718							TRUE	0.388772	TRUE	3	23	1	78.0447				Y	N	N	N	N
B3	dry-1d	tubclin	UNKNOWN	SYBR	None				34.3251	33.4111	1.12718							TRUE	0.388772	TRUE	3	22	1	78.2346				Y	N	N	N	N
B4	dry-1d	Max3	UNKNOWN	SYBR	None				37.7792	37.5546	0.282095							TRUE	0.0244637	TRUE	3	33	1	81.4637				Y	N	N	N	N
B5	dry-1d	Max3	UNKNOWN	SYBR	None				37.238	37.5546	0.282095							TRUE	0.0244637	TRUE	3	4	1	61.7095				Y	N	N	N	N
B6	dry-1d	Max3	UNKNOWN	SYBR	None				37.6467	37.5546	0.282095							TRUE	0.0244637	TRUE	3	30	1	81.4637				Y	N	N	N	N
B7	dry-1d	Max4	UNKNOWN	SYBR	None				30.1834	30.6658	0.417873							TRUE	0.0244637	TRUE	3	39	1	62.2793				N	Y	N	Y	N
B8	dry-1d	Max4	UNKNOWN	SYBR	None				30.9154	30.6658	0.417873							TRUE	0.0244637	TRUE	3	39	1	61.8994				N	Y	N	Y	N
B9	dry-1d	Max4	UNKNOWN	SYBR	None				30.8986	30.6658	0.417873							TRUE	0.0244637	TRUE	3	32	1	81.4637				N	N	N	N	N
B10	dry-1d	tubclin	UNKNOWN	SYBR	None				37.1405	36.6481	0.522926							TRUE	0.388772	TRUE	3	21	1	78.0447				N	N	N	N	N
B11	dry-1d	tubclin	UNKNOWN	SYBR	None				36.0992	36.6481	0.522926							TRUE	0.388772	TRUE	3	20	1	77.8547				N	N	N	N	N
B12	dry-1d	tubclin	UNKNOWN	SYBR	None				36.7046	36.6481	0.522926							TRUE	0.388772	TRUE	3	21	1	77.6648				N	N	N	N	N
C1	dry-2d	tubclin	UNKNOWN	SYBR	None				32.9134	32.9298	0.717326							TRUE	0.388772	TRUE	3	27	1	78.0447				Y	N	N	N	N
C2	dry-2d	tubclin	UNKNOWN	SYBR	None				32.2209	32.9298	0.717326							TRUE	0.388772	TRUE	3	25	1	78.2346				Y	N	N	N	N
C3	dry-2d	tubclin	UNKNOWN	SYBR	None				33.6553	32.9298	0.717326							TRUE	0.388772	TRUE	3	23	1	78.4246				Y	N	N	N	N
C4	dry-2d	Max3	UNKNOWN	SYBR	None				37.9154	37.4323	0.515854							TRUE	0.0244637	TRUE	3	39	1	61.7095				N	Y	N	Y	N
C5	dry-2d	Max3	UNKNOWN	SYBR	None				37.4925	37.4323	0.515854							TRUE	0.0244637	TRUE	3	39	1	61.5196	70.257			N	Y	N	Y	Y
C6	dry-2d	Max3	UNKNOWN	SYBR	None				36.889	37.4323	0.515854							TRUE	0.0244637	TRUE	3	39	1	61.8994				N	Y	N	Y	N
C7	dry-2d	Max4	UNKNOWN	SYBR	None				37.9154	37.5509	0.584366							TRUE	0.0244637	TRUE	3	29	1	81.6536				N	N	N	N	N
C8	dry-2d	Max4	UNKNOWN	SYBR	None				37.8604	37.5509	0.584366							TRUE	0.0244637	TRUE	3	29	1	81.4637				N	N	N	N	N
C9	dry-2d	Max4	UNKNOWN	SYBR	None				36.8769	37.5509	0.584366							TRUE	0.0244637	TRUE	3	30	1	81.4637				N	N	N	N	N
C10	dry-2d	tubclin	UNKNOWN	SYBR	None				35.0952	35.5485	0.473127							TRUE	0.388772	TRUE	3	19	1	78.2346				N	N	N	N	N
C11	dry-2d	tubclin	UNKNOWN	SYBR	None				35.5111	35.5485	0.473127							TRUE	0.388772	TRUE	3	19	1	78.0447				N	N	N	N	N
C12	dry-2d	tubclin	UNKNOWN	SYBR	None				36.0392	35.5485	0.473127							TRUE	0.388772	TRUE	3	17	1	77.8547				N	N	N	N	N
D1	dry-4d	tubclin	UNKNOWN	SYBR	None				22.9629	22.6233	0.717916							TRUE	0.388772	TRUE	3	21	1	78.2346				Y	N	N	N	N
D2	dry-4d	tubclin	UNKNOWN	SYBR	None				21.7986	22.6233	0.717916							TRUE	0.388772	TRUE	3	23	1	78.2346				Y	N	N	N	N
D3	dry-4d	tubclin	UNKNOWN	SYBR	None				23.1084	22.6233	0.717916							TRUE	0.388772	TRUE	3	20	1	78.4246				Y	N	N	N	N
D4	dry-4d	Max3	UNKNOWN	SYBR	None				33.4487	33.0442	0.738857							TRUE	0.0244637	TRUE	3	27	1	81.4637				Y	N	N	N	N
D5	dry-4d	Max3	UNKNOWN	SYBR	None				33.4925	33.0442	0.738857							TRUE	0.0244637	TRUE	3	30	1	81.8436				Y	N	N	N	N
D6	dry-4d	Max3	UNKNOWN	SYBR	None				32.1914	33.0442	0.738857							TRUE	0.0244637	TRUE	3	28	1	81.6536				Y	N	N	N	N
D7	dry-4d	Max4	UNKNOWN	SYBR	None				29.5062	29.4592	0.491547							TRUE	0.0244637	TRUE	3	39	1	61.8994	81.8436			N	Y	N	Y	Y
D8	dry-4d	Max4	UNKNOWN	SYBR	None				28.9459	29.4592	0.491547							TRUE	0.0244637	TRUE	3	32	1	81.8436				N	N	N	N	N
D9	dry-4d	Max4	UNKNOWN	SYBR	None				29.9256	29.4592	0.491547							TRUE	0.0244637	TRUE	3	32	1	81.6536				N	N	N	N	N
D10	dry-4d	tubclin	UNKNOWN	SYBR	None				25.0558	25.343	0.535661							TRUE	0.388772	TRUE	3	20	1	78.2346				N	N	N	N	N
D11	dry-4d	tubclin	UNKNOWN	SYBR	None				25.961	25.343	0.535661							TRUE	0.388772	TRUE	3	19	1	78.0447				N	N	N	N	N
D12	dry-4d	tubclin	UNKNOWN	SYBR	None				25.0122	25.343	0.535661							TRUE	0.388772	TRUE	3	20	1	77.8547				N	N	N	N	N
E1	dry-8d	tubclin	UNKNOWN	SYBR	None				25.5611	25.4461	0.21062							TRUE	0.388772	TRUE	3	22	1	78.2346				N	N	N	N	N
E2	dry-8d	tubclin	UNKNOWN	SYBR	None				25.5741	25.4461	0.21062							TRUE	0.388772	TRUE	3	22	1	78.4246				N	N	N	N	N
E3	dry-8d	tubclin	UNKNOWN	SYBR	None				25.203	25.4461	0.21062							TRUE	0.388772	TRUE	3	19	1	78.4246				N	N	N	N	N
E4	dry-8d	Max3	UNKNOWN	SYBR	None				30.818	30.5148	0.307677							TRUE	0.0244637	TRUE	3	29	1	81.6536				N	N	N	N	N
E5	dry-8d	Max3	UNKNOWN	SYBR	None				30.5234	30.5148	0.307677							TRUE	0.0244637	TRUE	3	28	1	81.6536				N	N	N	N	N
E6	dry-8d	Max3	UNKNOWN	SYBR	None				30.2029	30.5148	0.307677							TRUE	0.0244637	TRUE	3	28	1	81.6536				N	N	N	N	N
E7	dry-8d	Max4	UNKNOWN	SYBR	None				33.9861	33.5593	0.376043							TRUE	0.0244637	TRUE	3	39	1	62.0894				N	Y	N	Y	N
E8	dry-8d	Max4	UNKNOWN	SYBR	None				33.4154	33.5593	0.376043							TRUE	0.0244637	TRUE	3	39	1	61.8994	81.0838			N	Y	N	Y	Y
E9	dry-8d	Max4	UNKNOWN	SYBR	None				33.2765	33.5593	0.376043							TRUE	0.0244637	TRUE	3	39	1	61.8994	78.9944			N	Y	N	Y	Y
E10	dry-8d	tubclin	UNKNOWN	SYBR	None				23.6407	23.8719	0.209472							TRUE	0.388772	TRUE	3	22	1	78.4246				N	N	N	N	N
E11	dry-8d	tubclin	UNKNOWN	SYBR	None				24.049	23.8719	0.209472							TRUE	0.388772	TRUE	3	21	1	78.2346				N	N	N	N	N
E12	dry-8d	tubclin	UNKNOWN	SYBR	None				23.926	23.8719	0.209472							TRUE	0.388772	TRUE	3	22	1	77.8547				N	N	N	N	N
Analysis Type	Singleplex
Endogenous Control	tubclin
RQ Min/Max Confidence Level	95.0
Reference Sample	dry-CK
